# Supplementary material for: Iodine mediated reaction of quinones and N-substituted amino esters to 2-substituted benzo[f]isoindole-4,9-diones
Source: Royal Society of Chemistry journal article supplement (doi:10.1039/c3ra44095h), 2013-01-01
Supplement: c3ra44095h.pdf [file c3ra44095h.pdf]

**Iodine Mediated Reactions of Quinones and *N*-substituted Amino  
Esters to 2-Substituted benzo[*f*]isoindole-4,9-diones**

**Yu-jin Li\*, Huan-ming Huang, Jie Ju, Jian-hong Jia, Liang Han, Qing Ye, Wu-bin Yu  
and Jianrong Gao\***

**State Key Laboratory Breeding Base of Green Chemistry-Synthesis Technology,  
Zhejiang University of Technology, Hangzhou and 310032, P. R. China**

**Fax: (+)86-0571-88320544**

**E-mail: lyjzjut@zjut.edu.cn**

**gdgjr@zjut.edu.cn**

## Table of contents

|                                               |     |
|-----------------------------------------------|-----|
| 1. The GC-MS Spectra of the reaction.....     | S 2 |
| 2. NMR Spectra.....                           | S 4 |
| 3. X ray Crystal Structure of <b>3d</b> ..... | S24 |

## 1. The GC-MS Spectra of the reaction

- a) A mixture of sarcosine ethyl ester (**2a**, 2.0 mmol, 0.234 g, 2.0 equiv.), KF (2.0 mmol, 0.116 g, 2.0 equiv.), Iodine (1 mmol, 0.254 g, 1.0 equiv.) in CH<sub>3</sub>CN (5.0 mL), was stirred at room temperature for 1h. Then the mixture detected by GC-MS. The following two intermediates were captured.

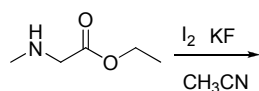

**2a**

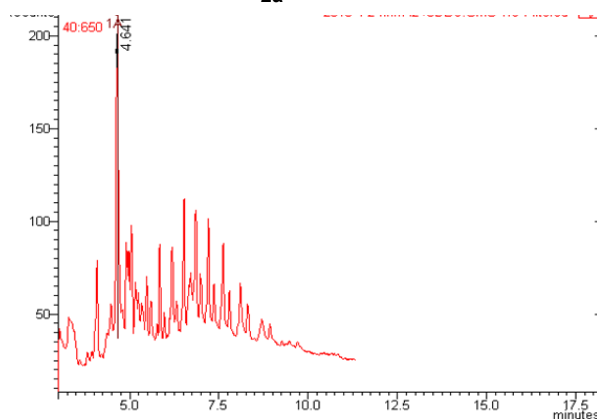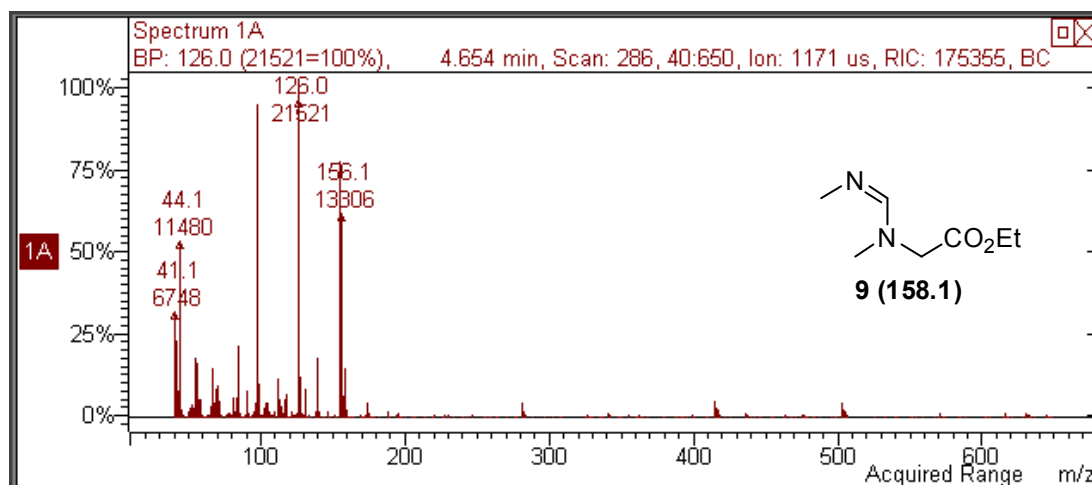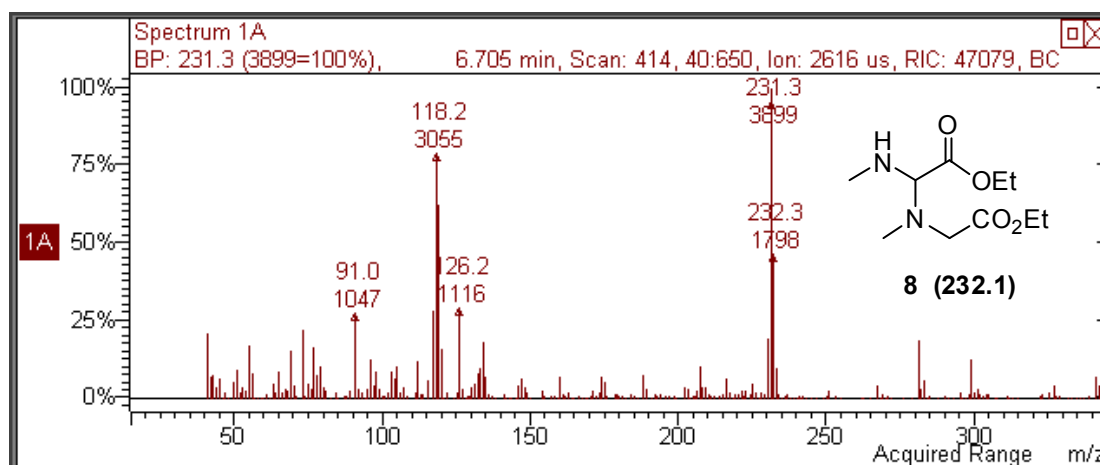

- b) A mixture of 1,4-naphthoquinone (**1a**, 1.0 mmol, 0.158 g, 1.0 equiv.), sarcosine ethyl ester (**2a**, 2.0 mmol, 0.234 g, 2.0 equiv.), KF (2.0 mmol, 0.116 g, 2.0 equiv.), Iodine (0.5 mmol, 0.127g, 0.5 equiv.) in CH<sub>3</sub>CN (5.0 mL), was stirred at refluxing temperature for 2 h. Then, the mixture detected by GC-MS and the following intermediate was captured.

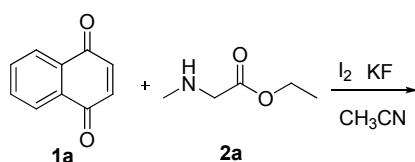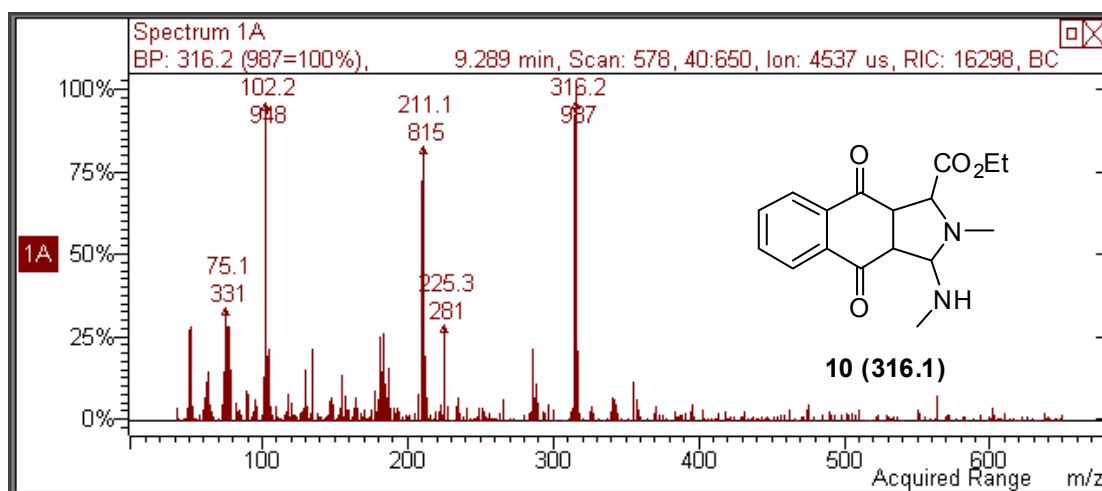

## 2. NMR Spectra

$^1\text{H}$  NMR ( $\text{CDCl}_3$ , 500 MHz)

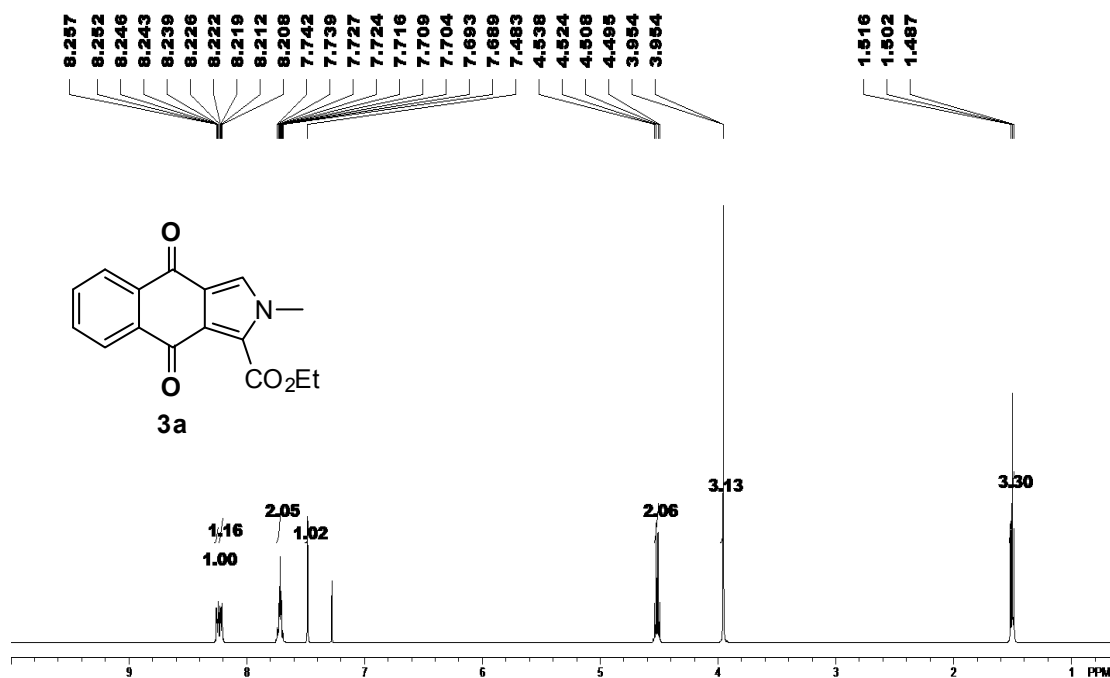

$^{13}\text{C}$  NMR ( $\text{CDCl}_3$ , 125 MHz)

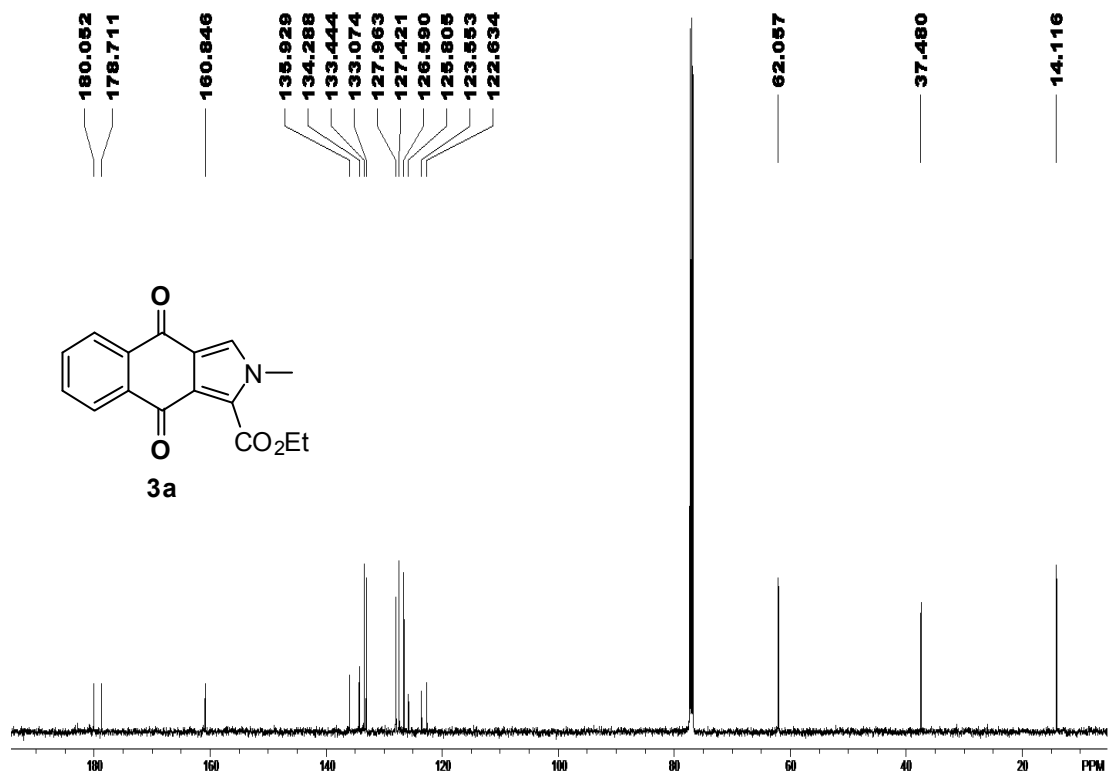

$^1\text{H}$  NMR ( $\text{CDCl}_3$ , 500 MHz)

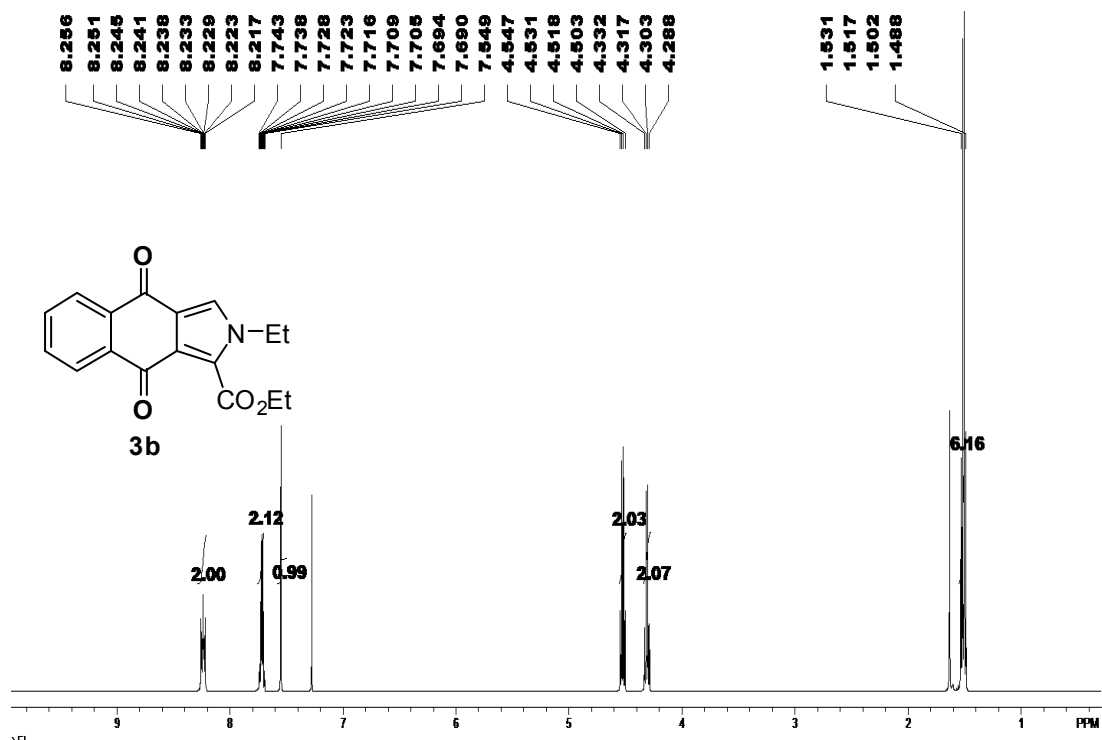

$^{13}\text{C}$  NMR ( $\text{CDCl}_3$ , 125 MHz)

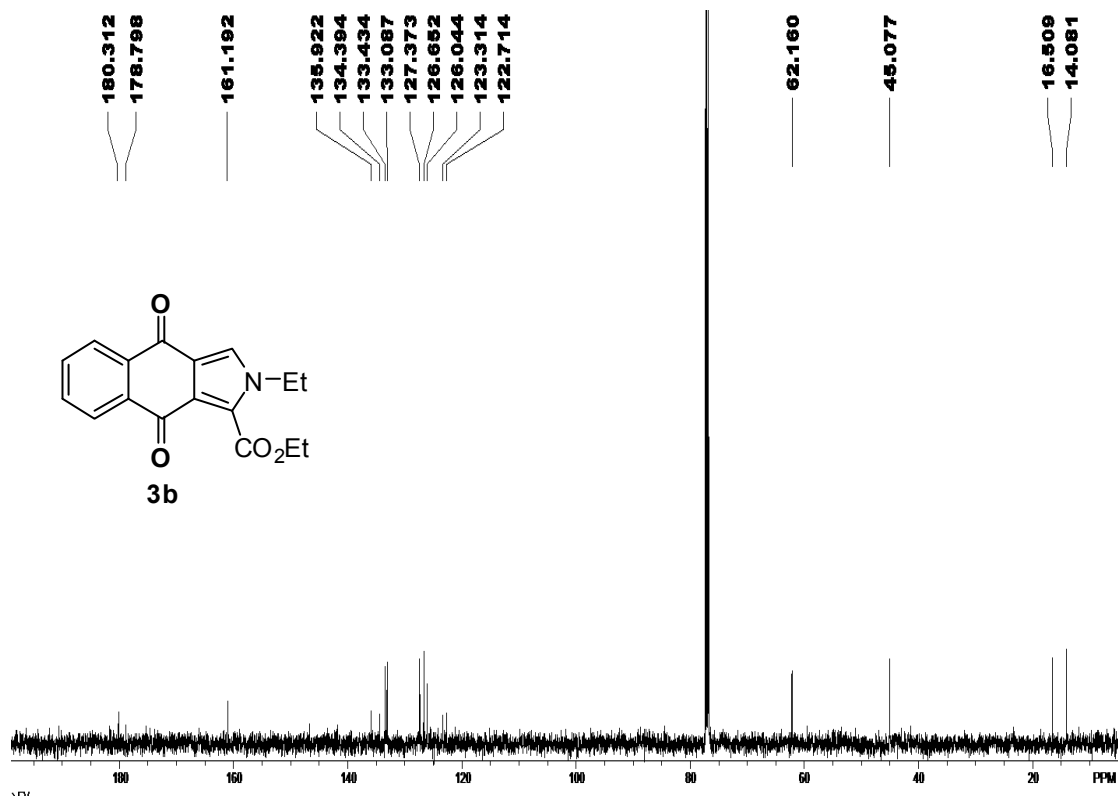

$^1\text{H}$  NMR ( $\text{CDCl}_3$ , 500 MHz)

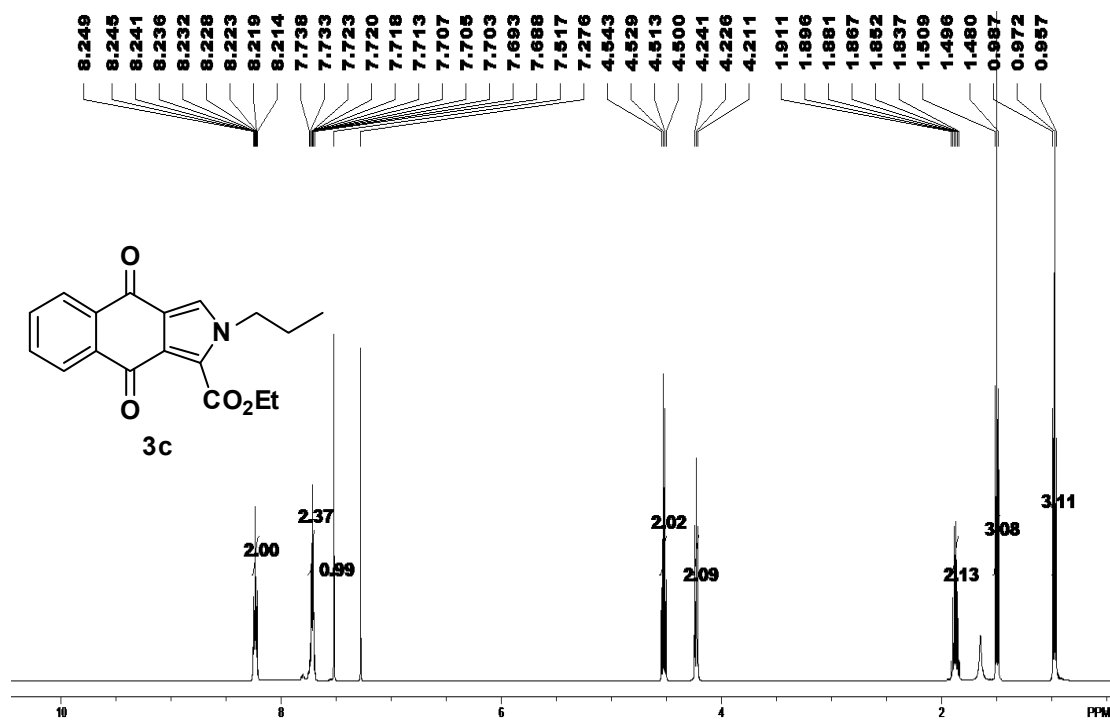

$^{13}\text{C}$  NMR ( $\text{CDCl}_3$ , 125 MHz)

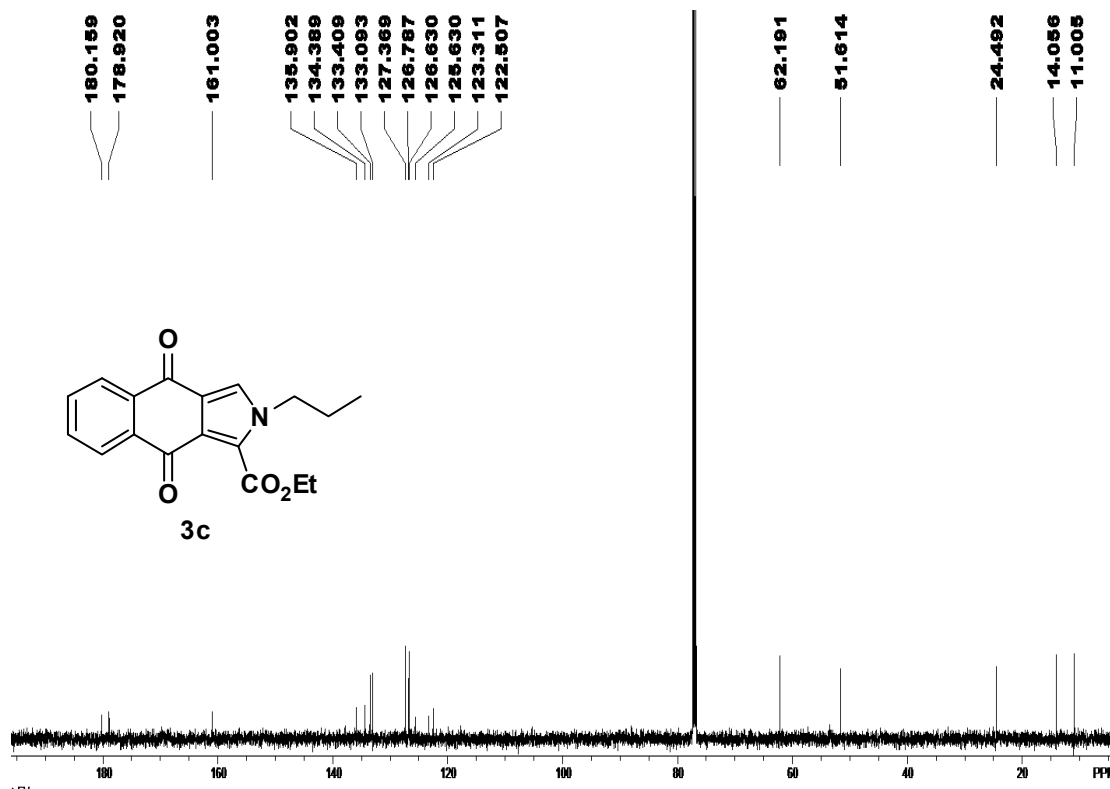

$^1\text{H}$  NMR ( $\text{CDCl}_3$ , 500 MHz)

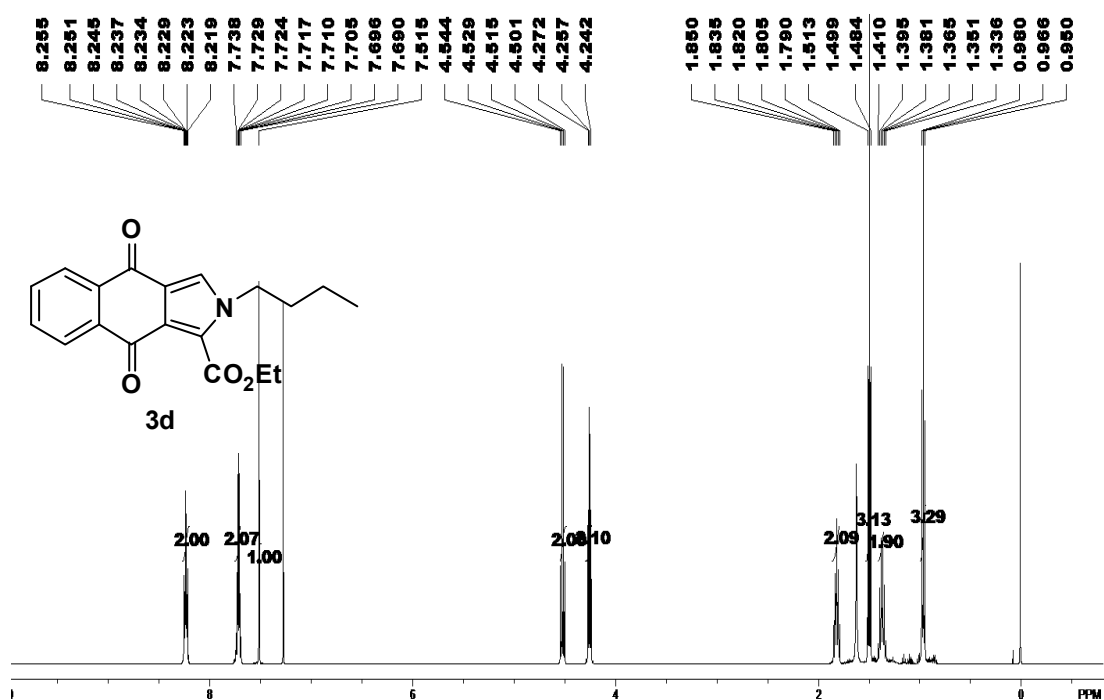

$^{13}\text{C}$  NMR ( $\text{CDCl}_3$ , 125 MHz)

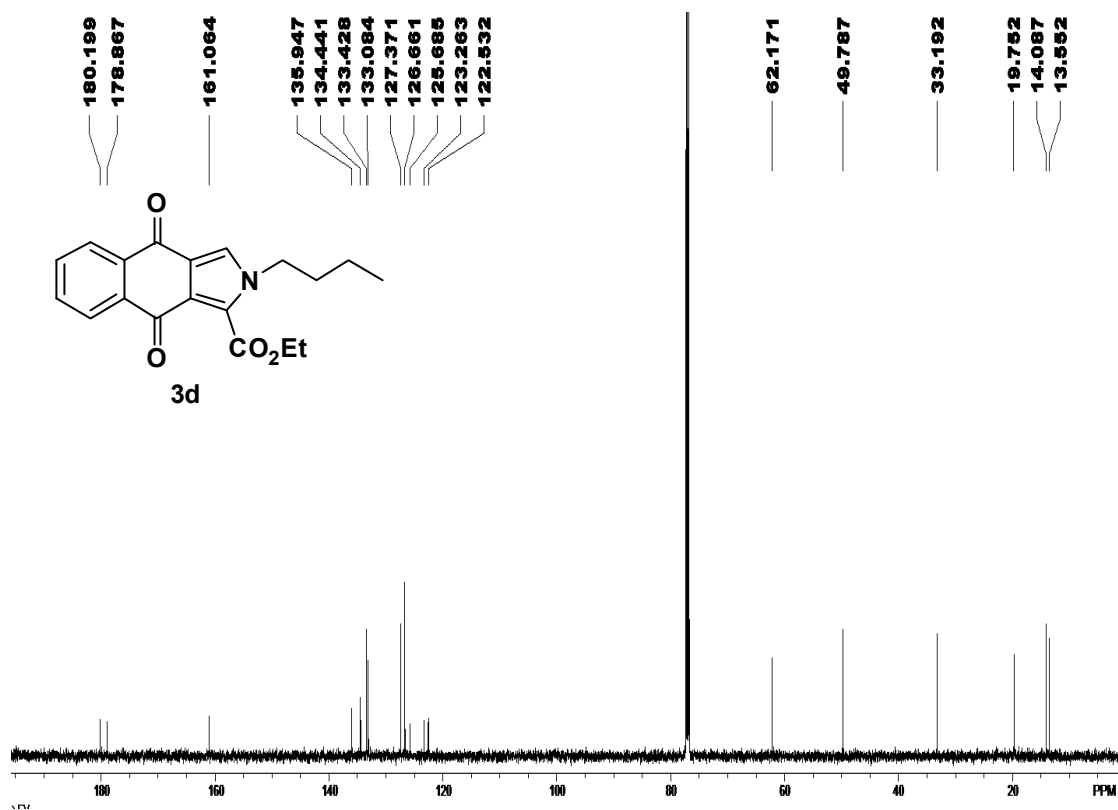



$^1\text{H}$  NMR ( $\text{CDCl}_3$ , 500 MHz)

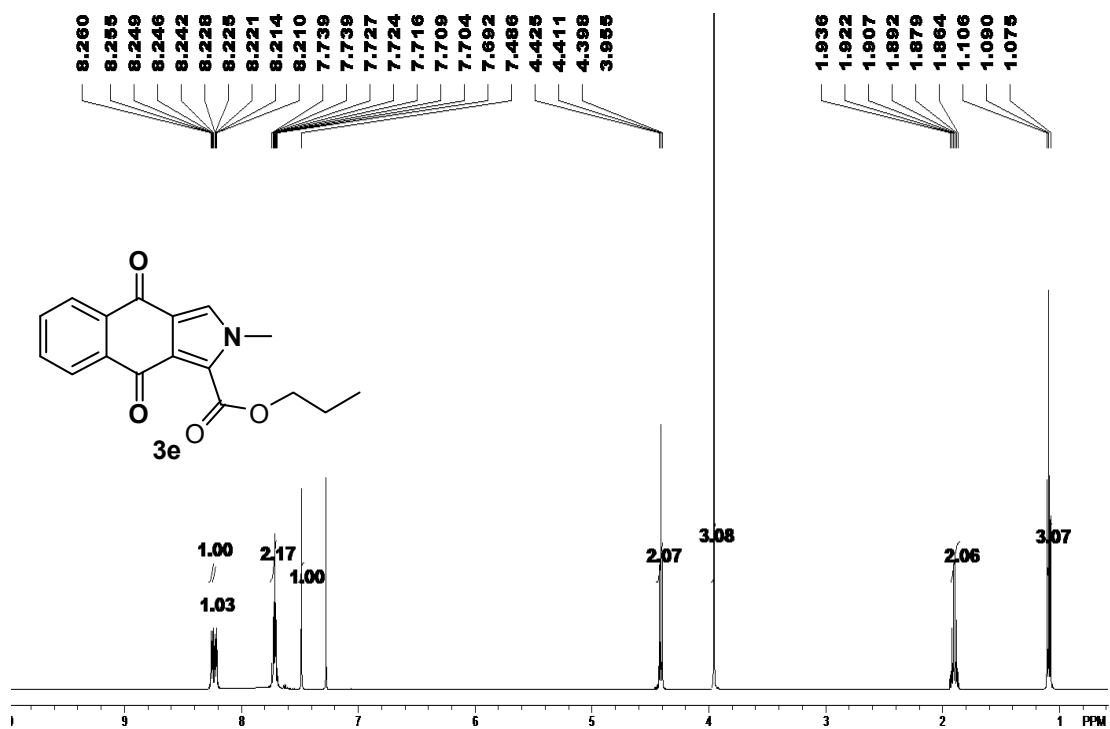

$^{13}\text{C}$  NMR ( $\text{CDCl}_3$ , 125 MHz)

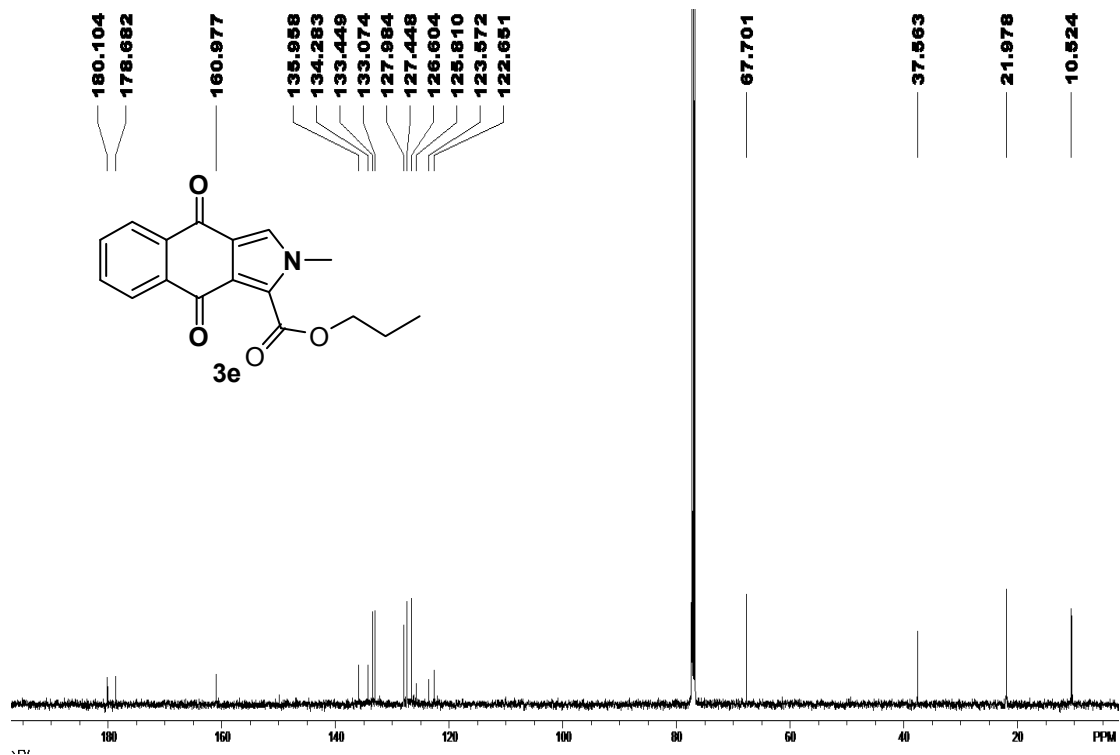

$^1\text{H}$  NMR ( $\text{CDCl}_3$ , 500 MHz)

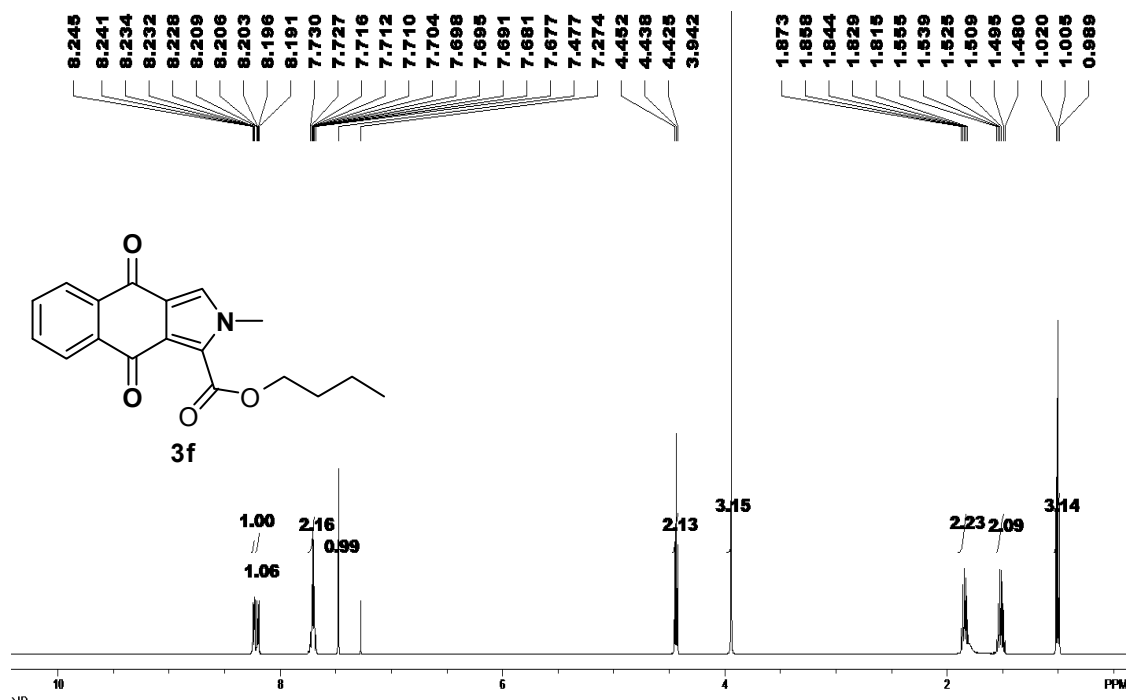

$^{13}\text{C}$  NMR ( $\text{CDCl}_3$ , 125 MHz)

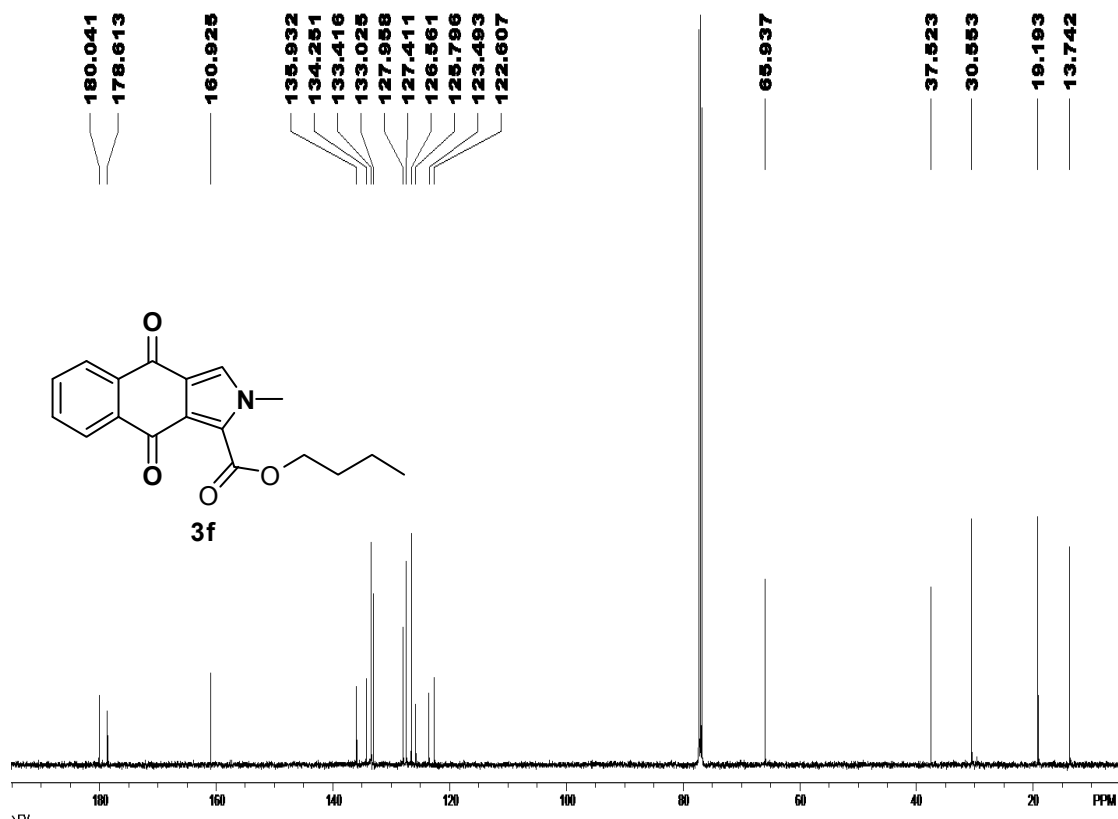

$^1\text{H}$  NMR ( $\text{CDCl}_3$ , 500 MHz)

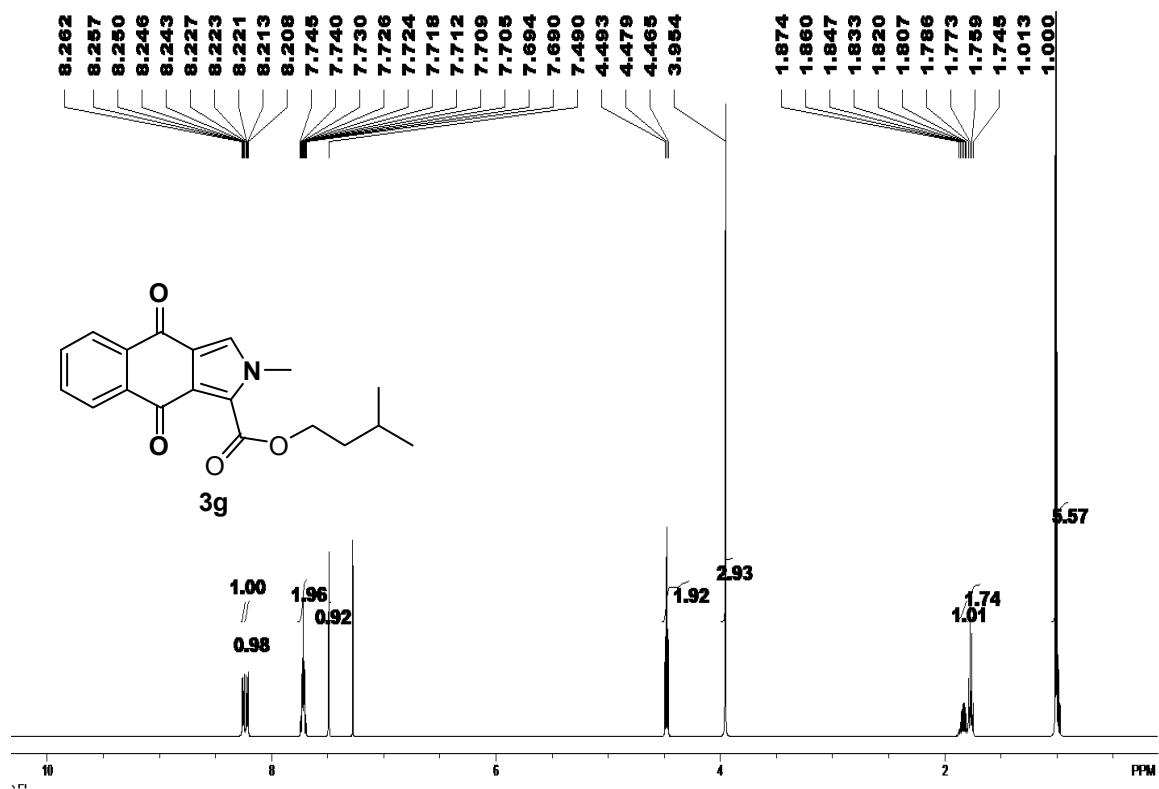

$^{13}\text{C}$  NMR ( $\text{CDCl}_3$ , 125 MHz)

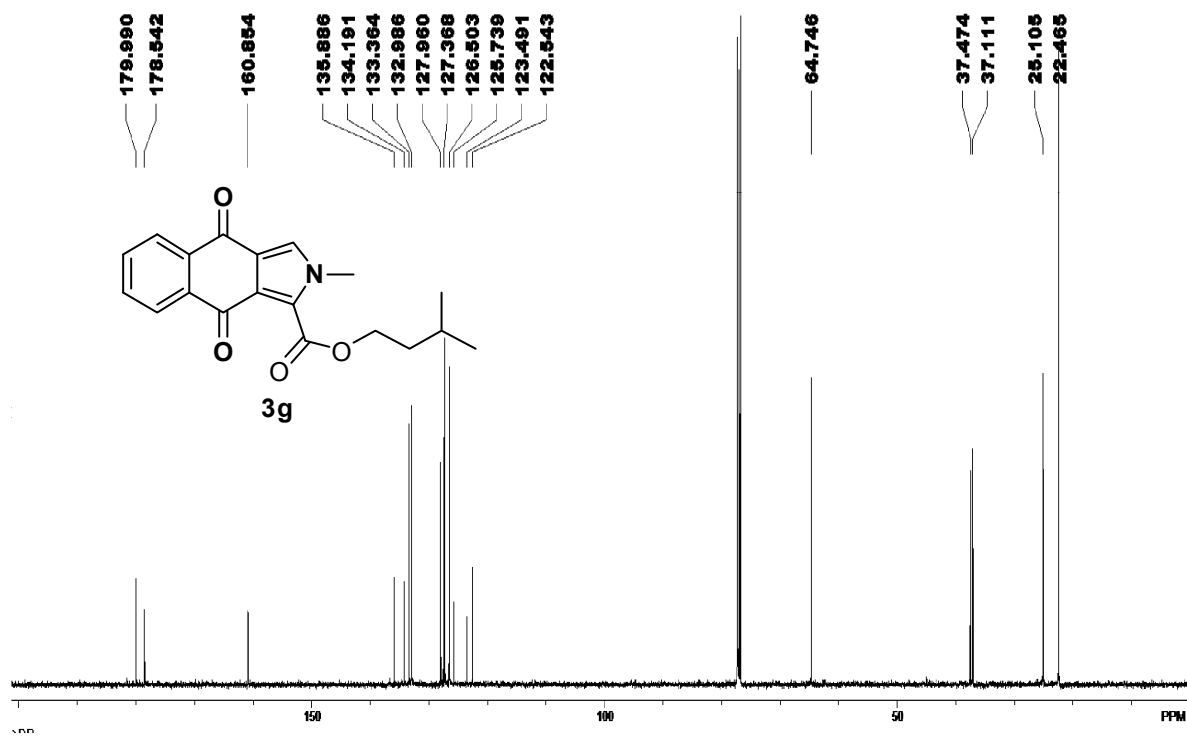

$^1\text{H}$  NMR ( $\text{CDCl}_3$ , 500 MHz)

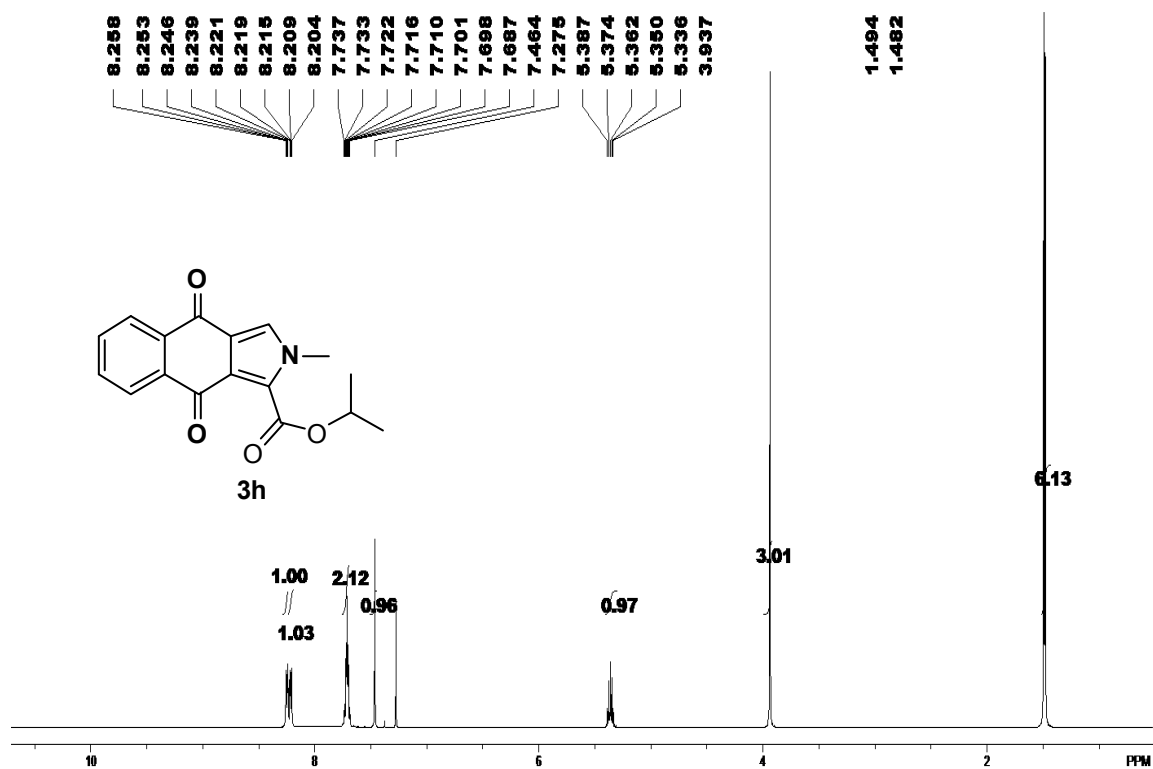

$^{13}\text{C}$  NMR ( $\text{CDCl}_3$ , 125 MHz)

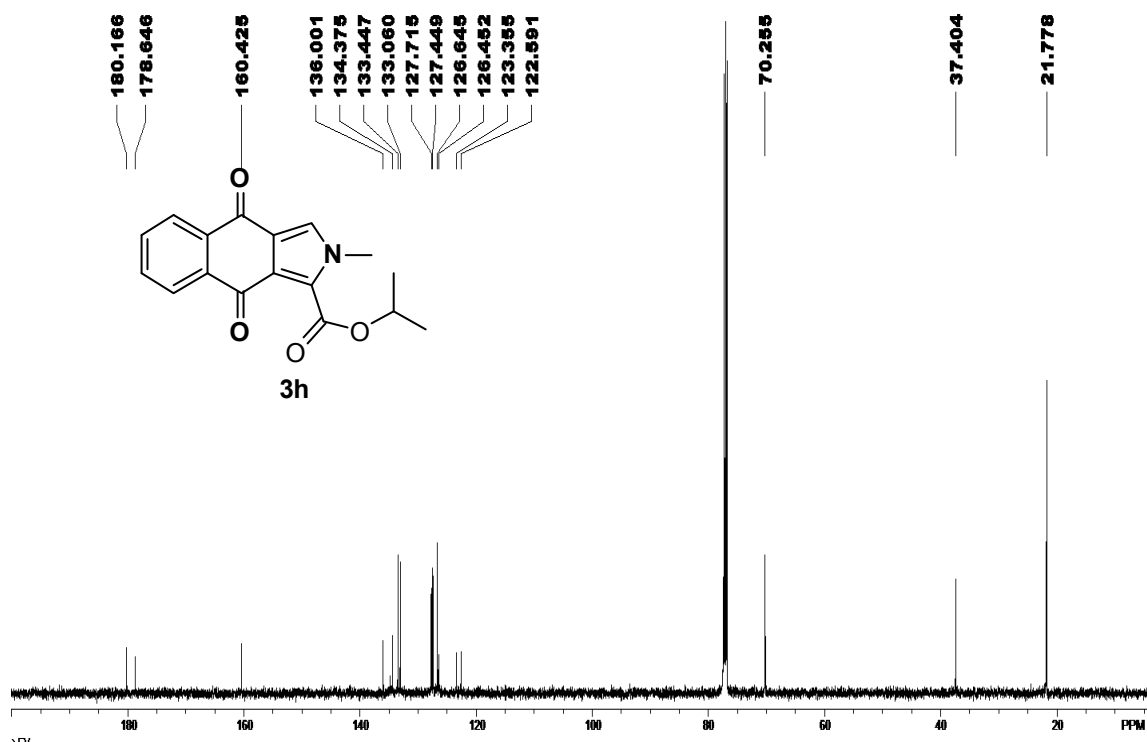

$^1\text{H}$  NMR ( $\text{CDCl}_3$ , 500 MHz)

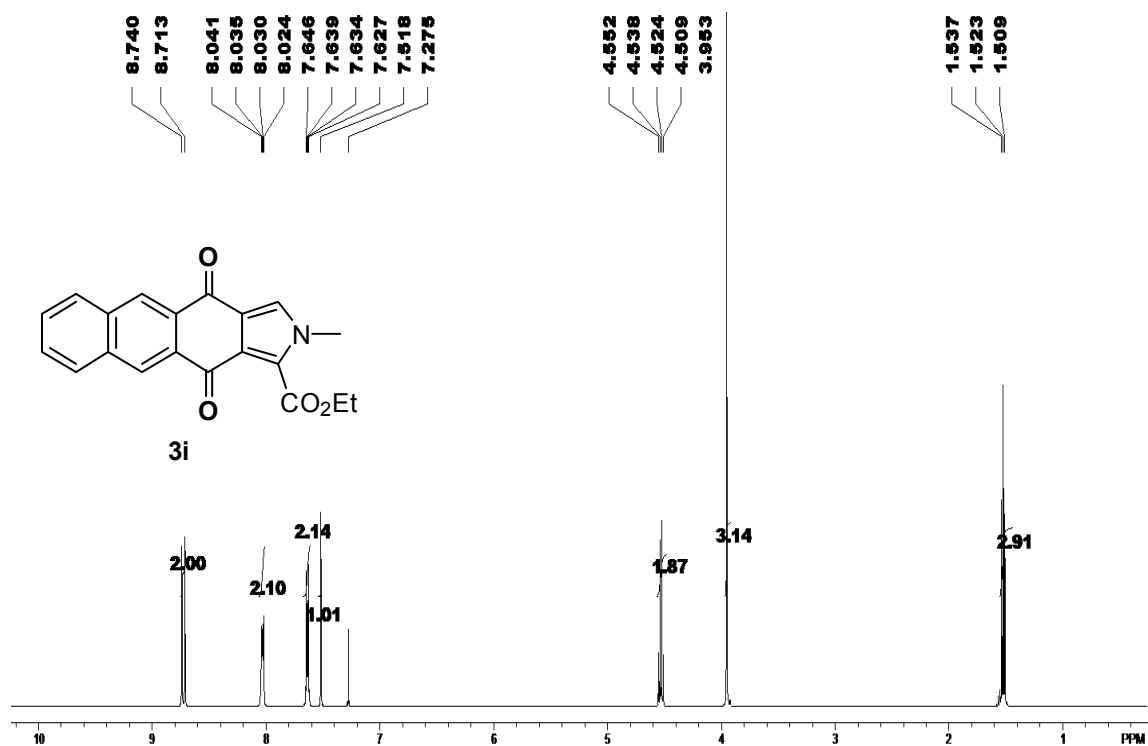

$^{13}\text{C}$  NMR ( $\text{CDCl}_3$ , 125 MHz)

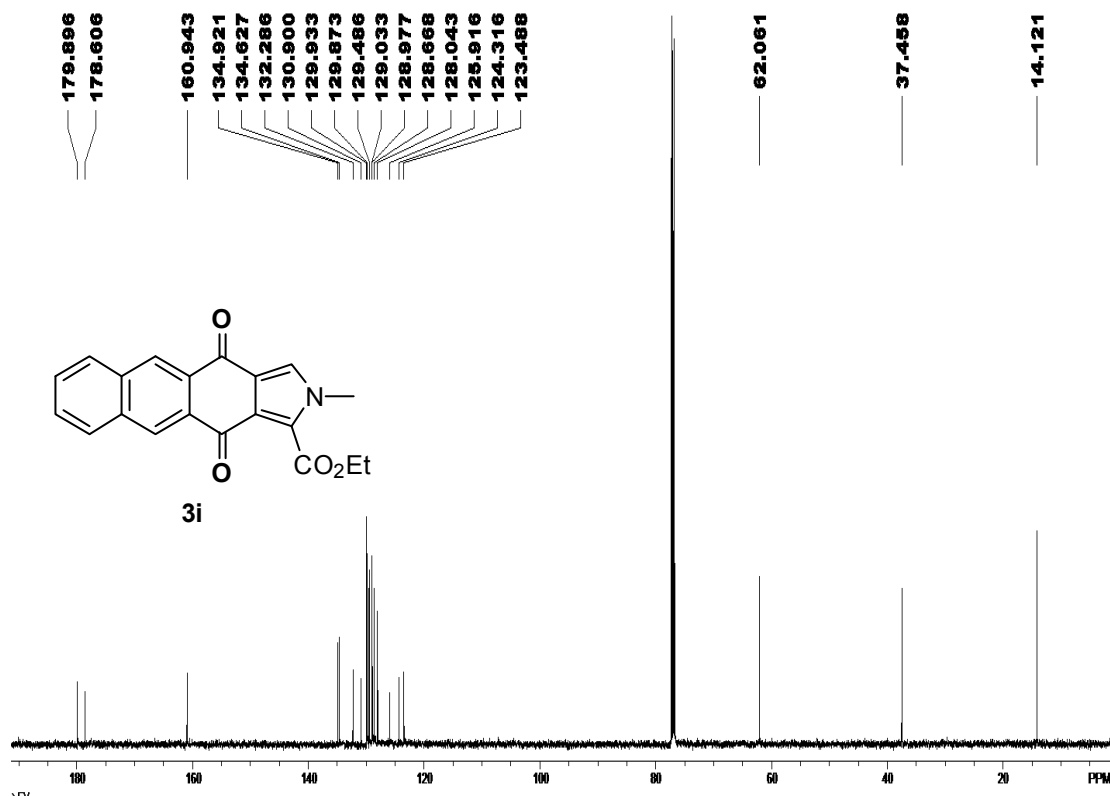

$^1\text{H}$  NMR ( $\text{CDCl}_3$ , 500 MHz)

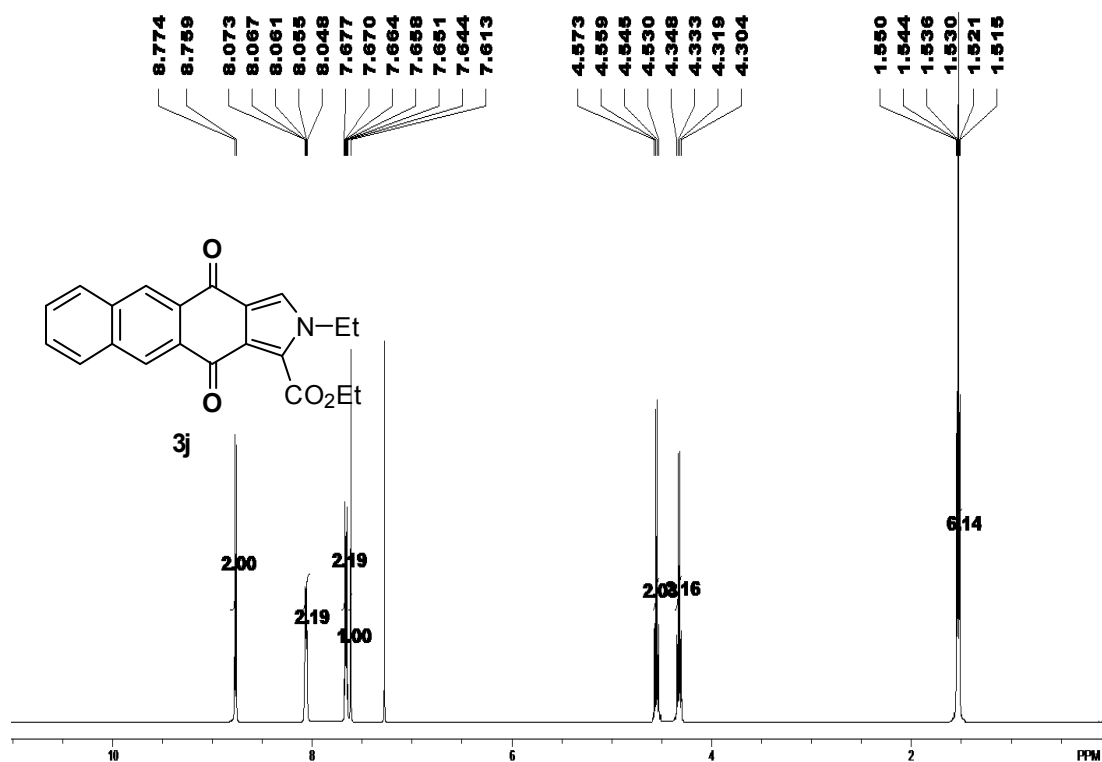

$^{13}\text{C}$  NMR ( $\text{CDCl}_3$ , 125 MHz)

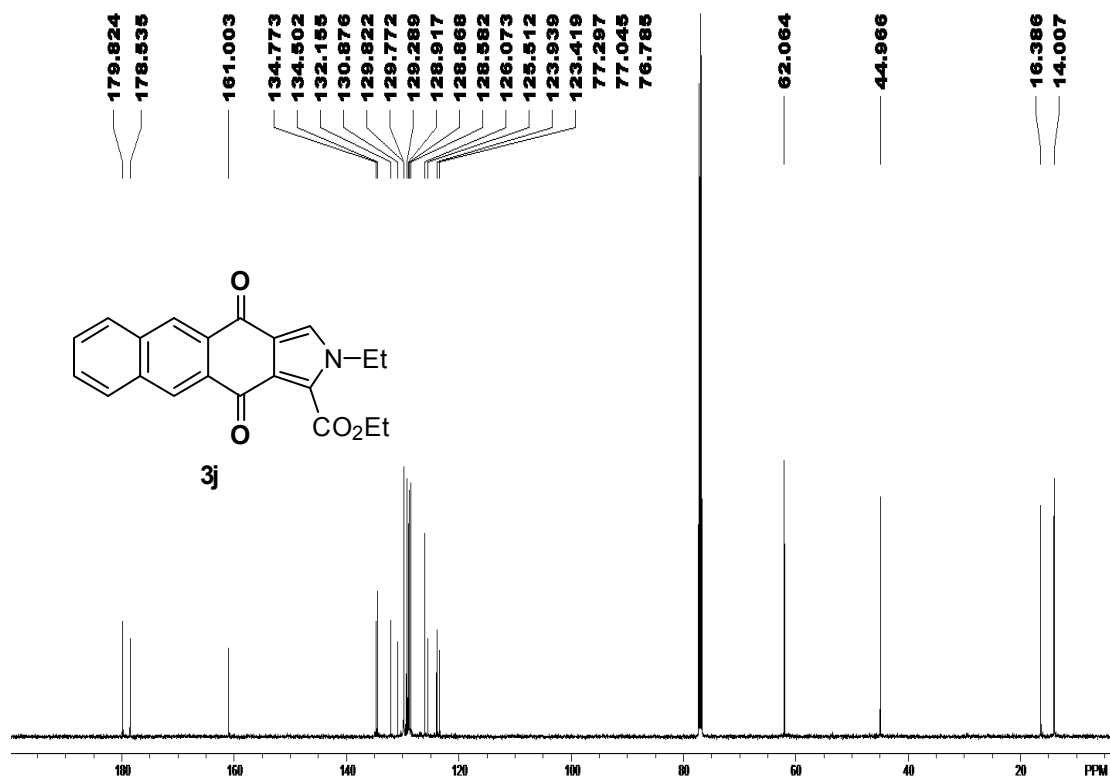

$^1\text{H}$  NMR ( $\text{CDCl}_3$ , 500 MHz)

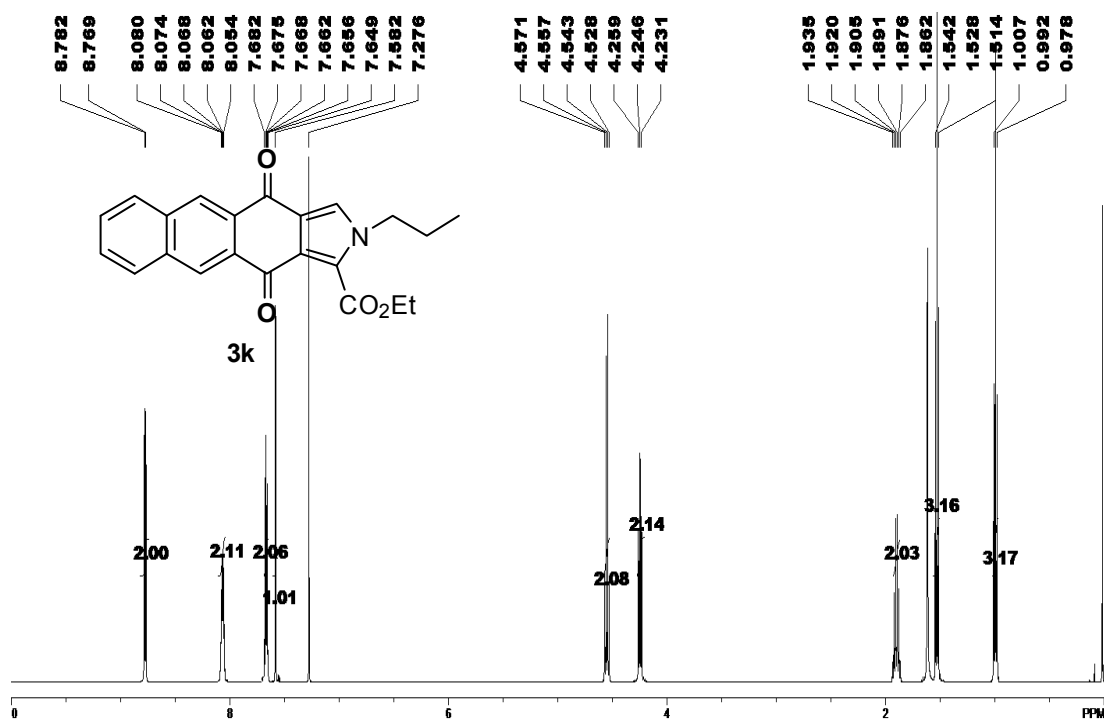

$^{13}\text{C}$  NMR ( $\text{CDCl}_3$ , 125 MHz)

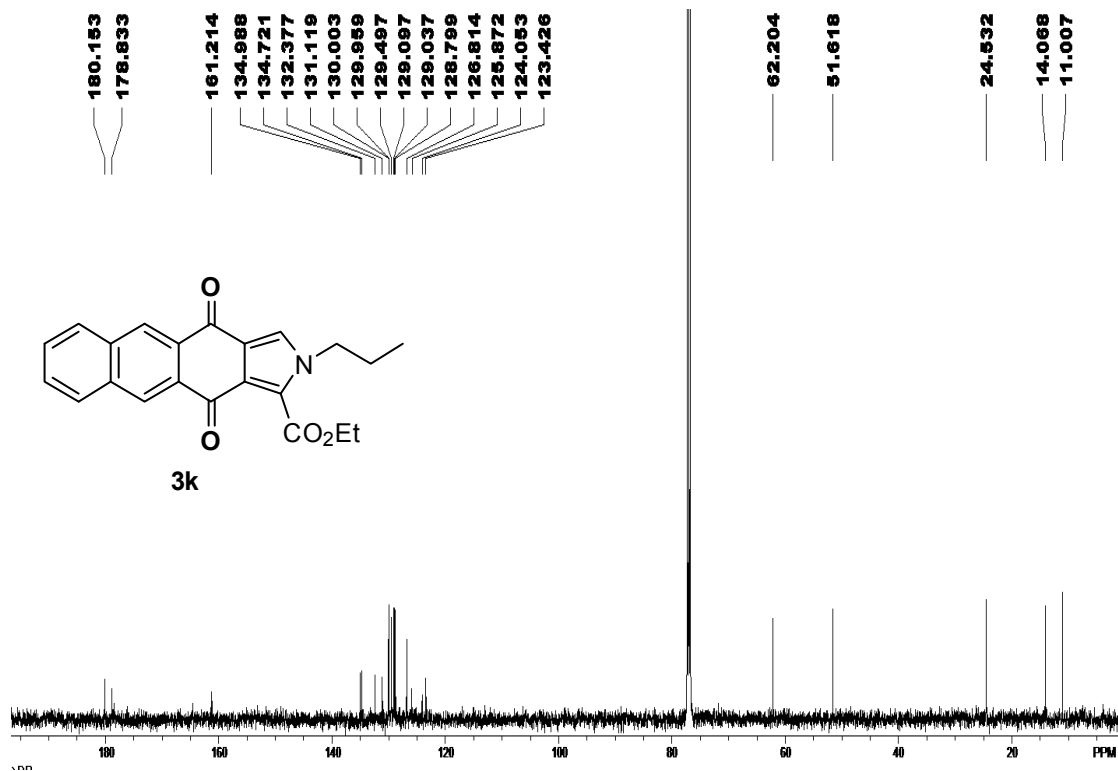

$^1\text{H}$  NMR ( $\text{CDCl}_3$ , 500 MHz)

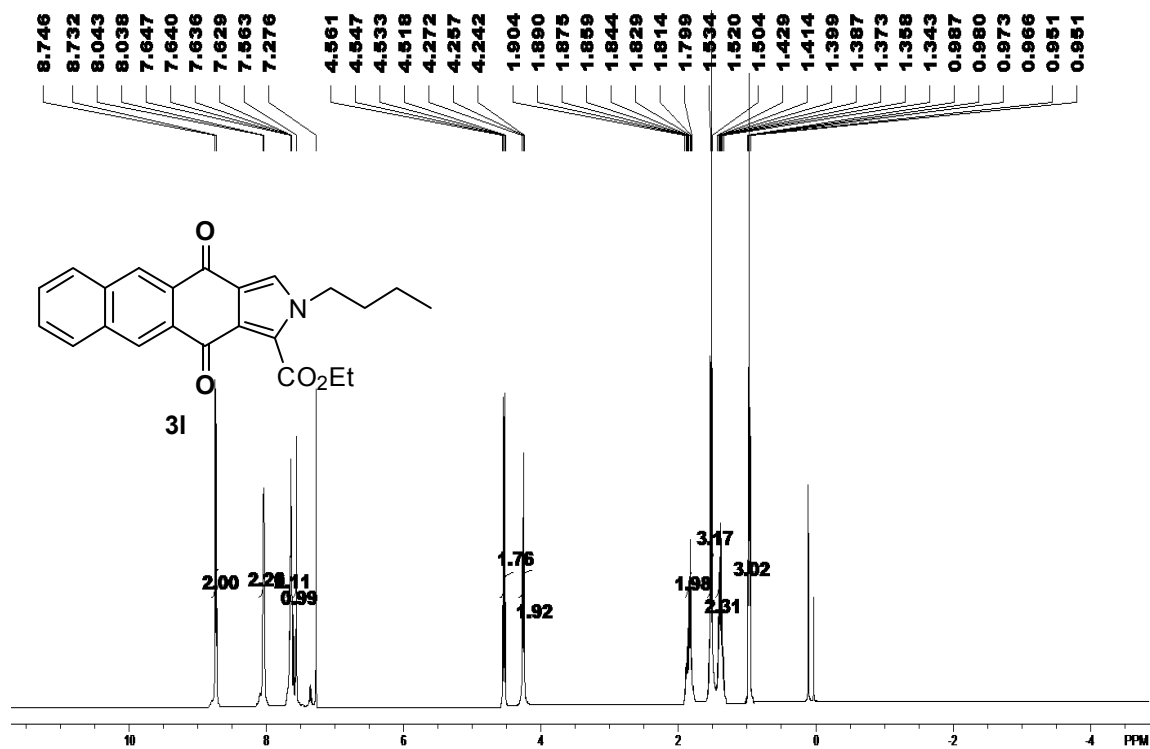

$^{13}\text{C}$  NMR ( $\text{CDCl}_3$ , 125 MHz)

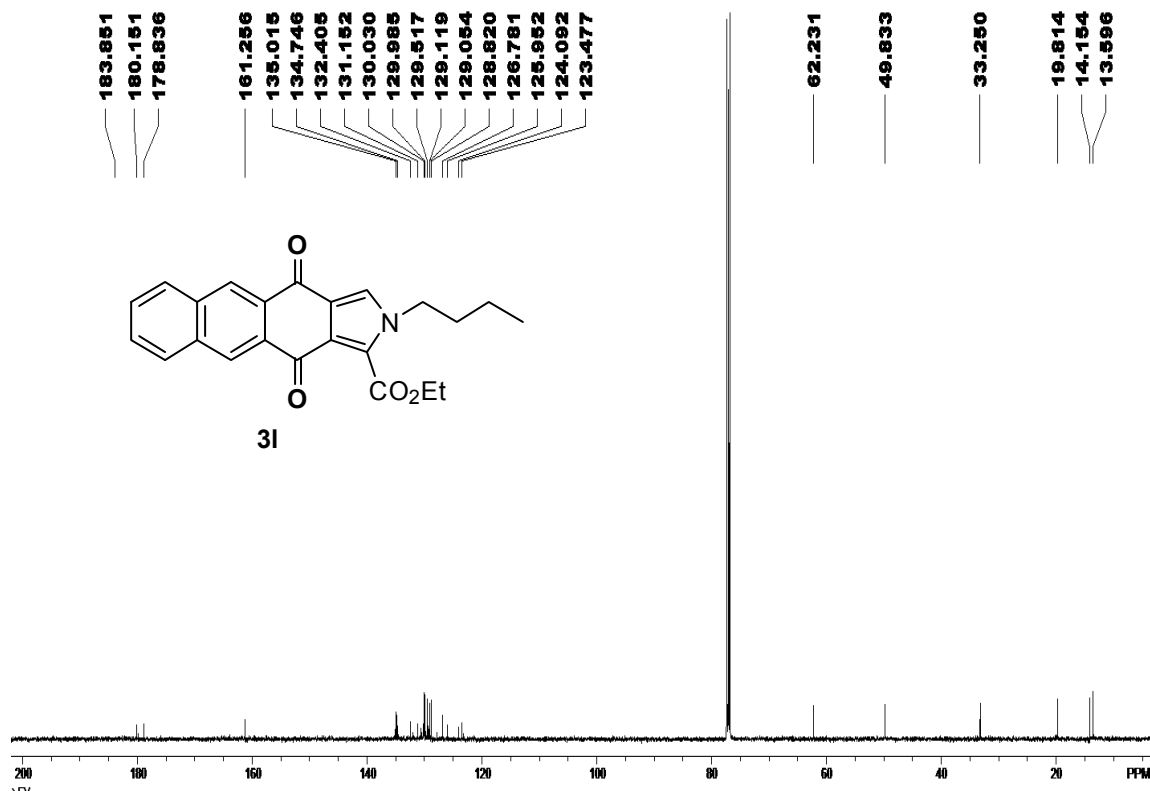



$^1\text{H}$  NMR ( $\text{CDCl}_3$ , 500 MHz)

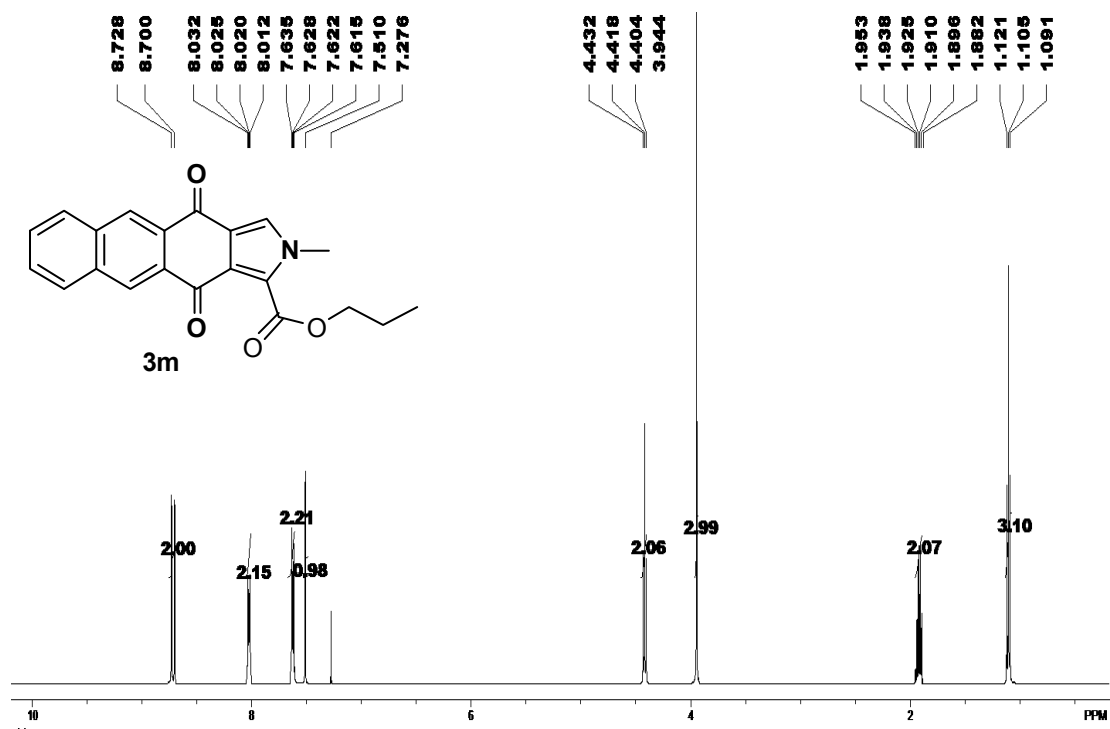

$^{13}\text{C}$  NMR ( $\text{CDCl}_3$ , 125 MHz)

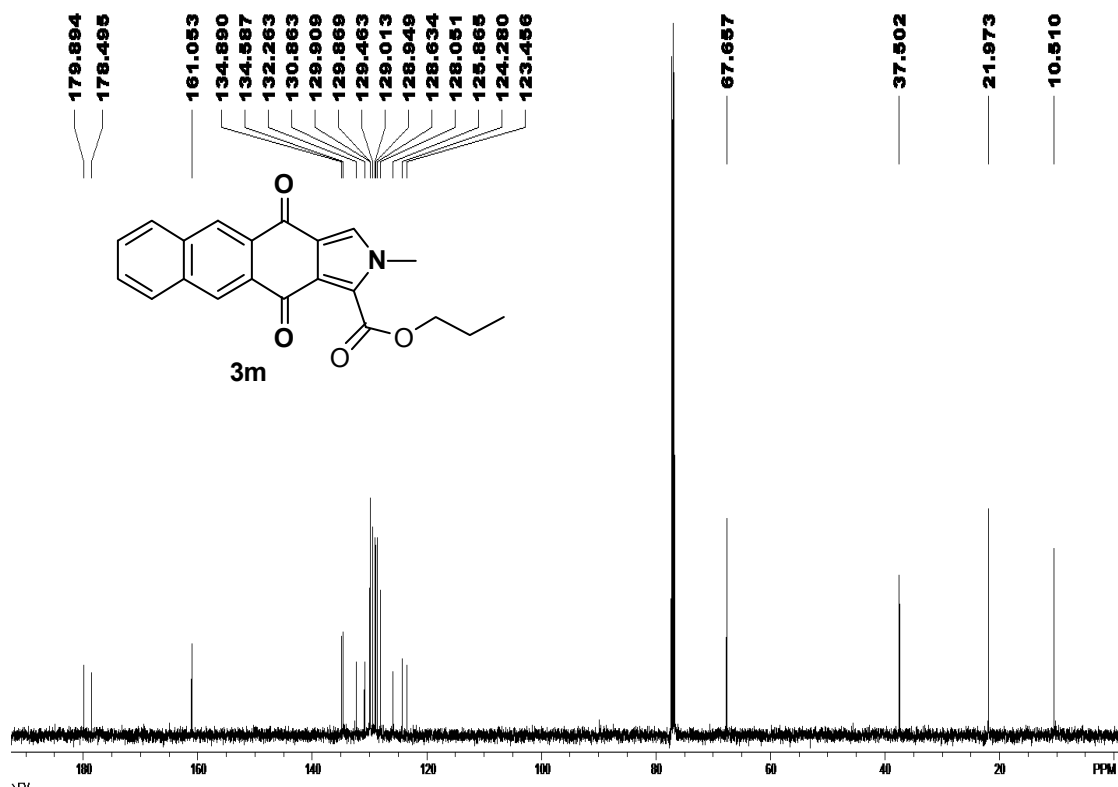

$^1\text{H}$  NMR ( $\text{CDCl}_3$ , 500 MHz)

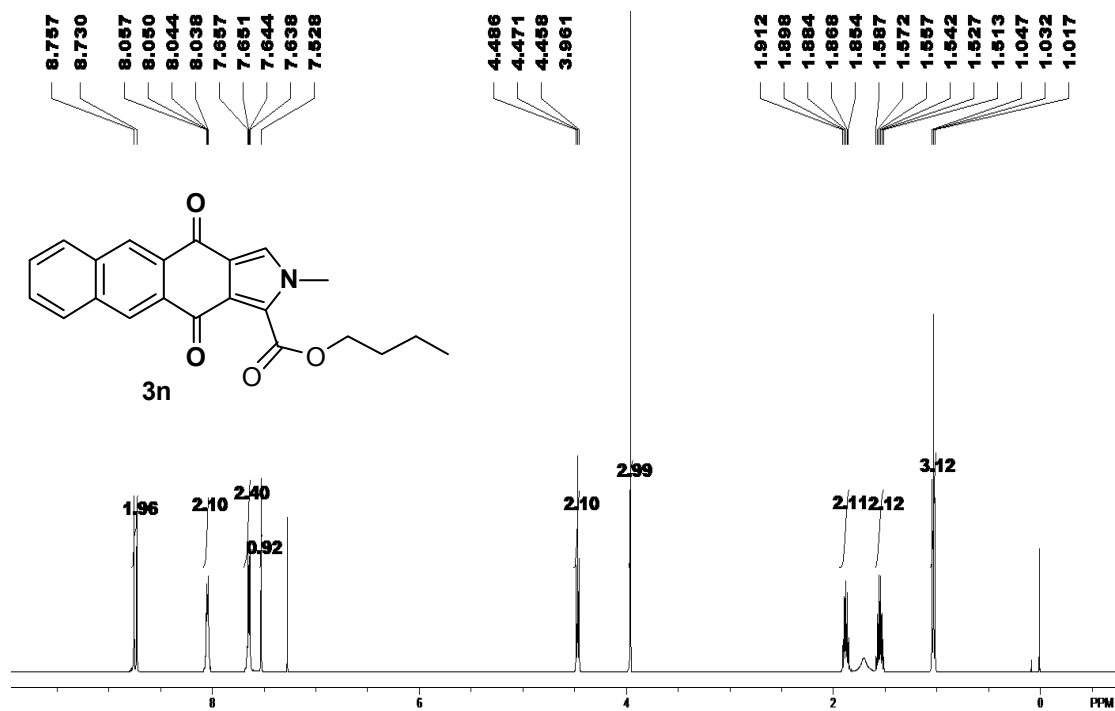

$^{13}\text{C}$  NMR ( $\text{CDCl}_3$ , 125 MHz)

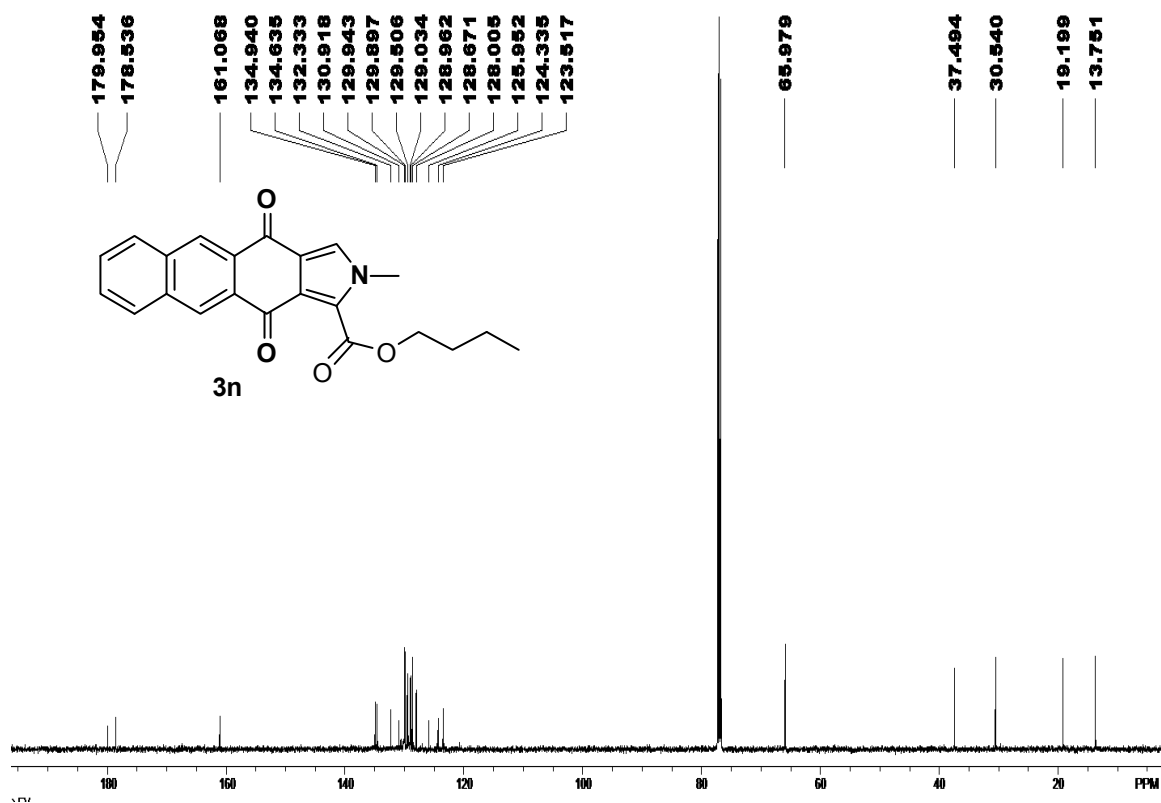

$^1\text{H}$  NMR ( $\text{CDCl}_3$ , 500 MHz)

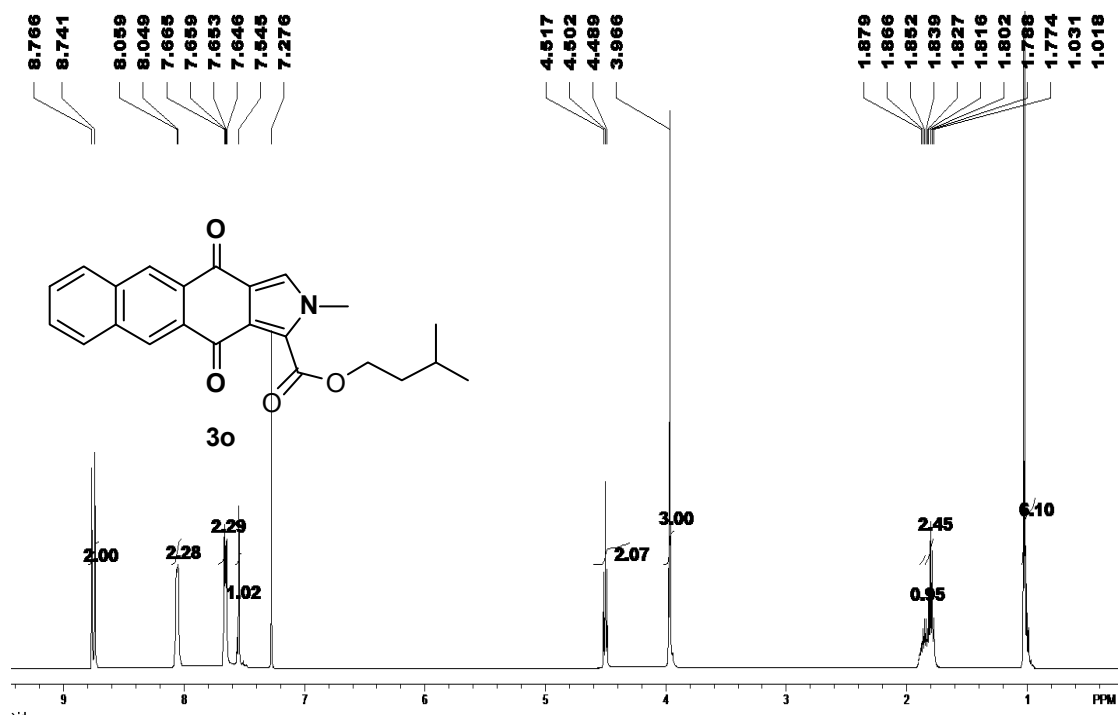

$^{13}\text{C}$  NMR ( $\text{CDCl}_3$ , 125 MHz)

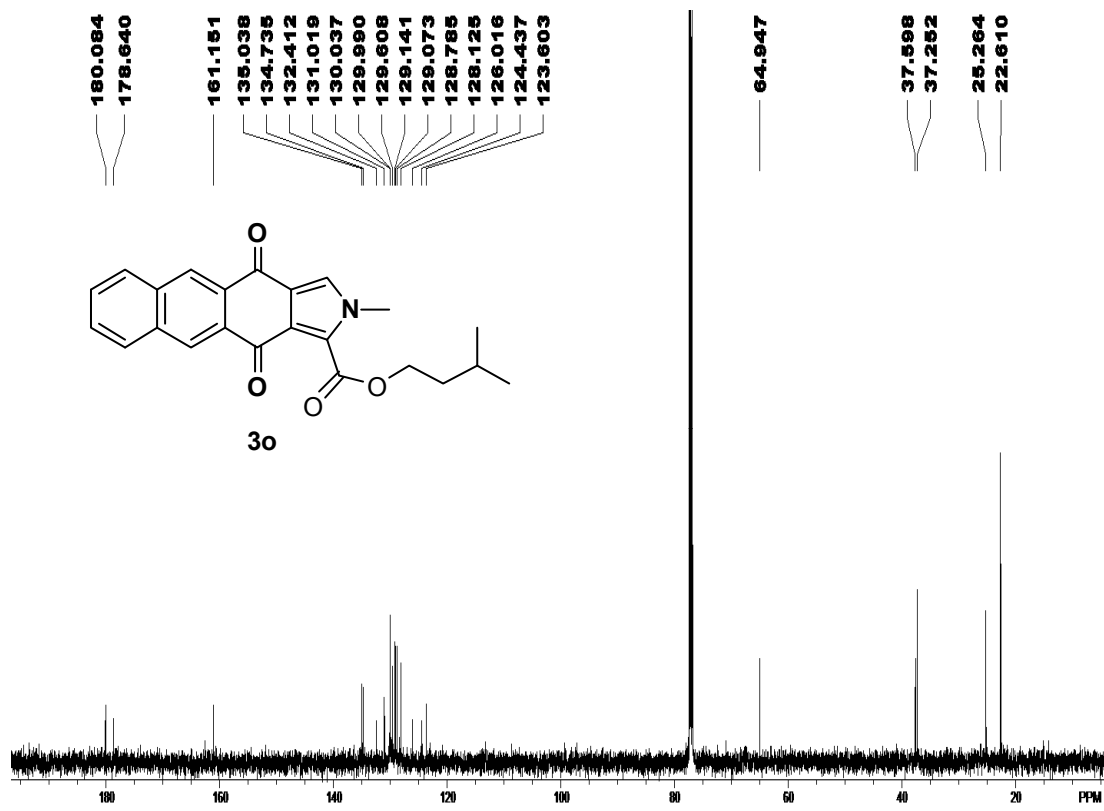

$^1\text{H}$  NMR ( $\text{CDCl}_3$ , 500 MHz)

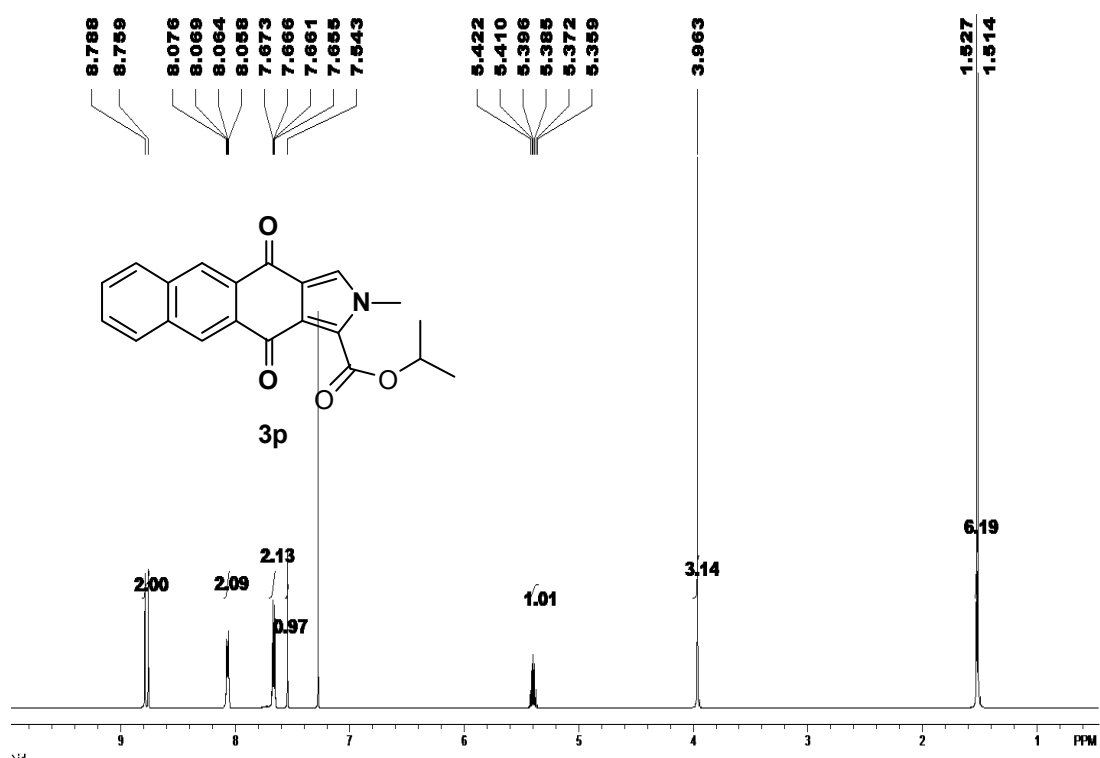

$^{13}\text{C}$  NMR ( $\text{CDCl}_3$ , 125 MHz)

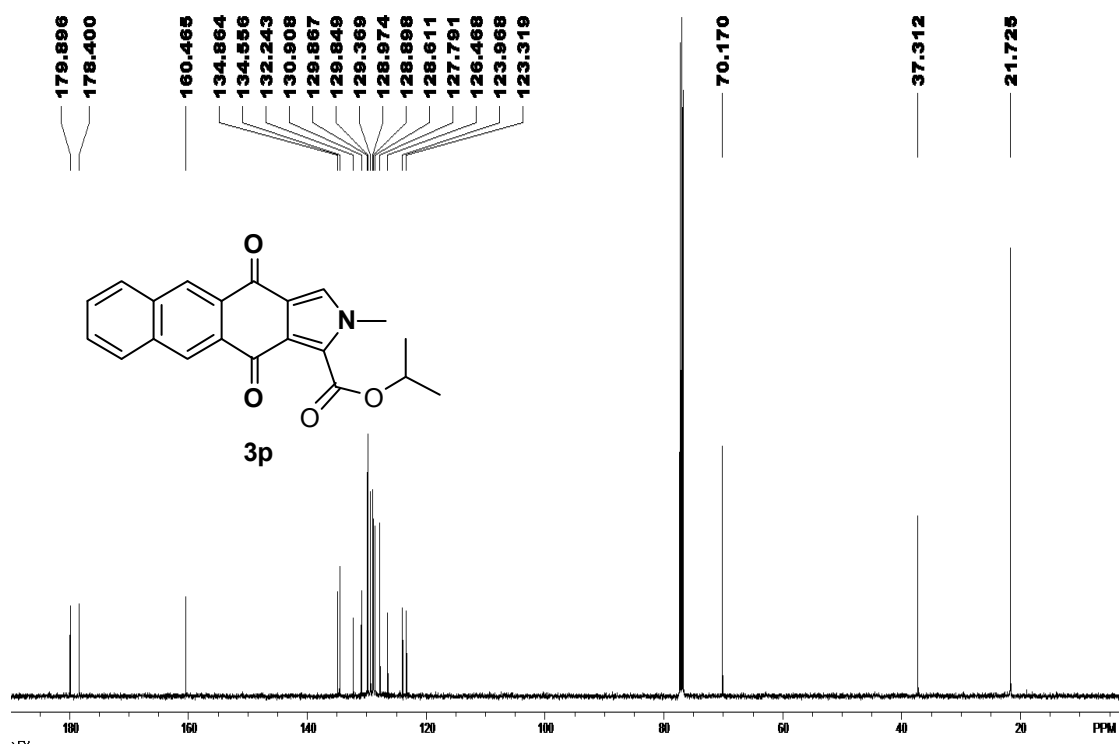

$^1\text{H}$  NMR ( $\text{CDCl}_3$ , 500 MHz)

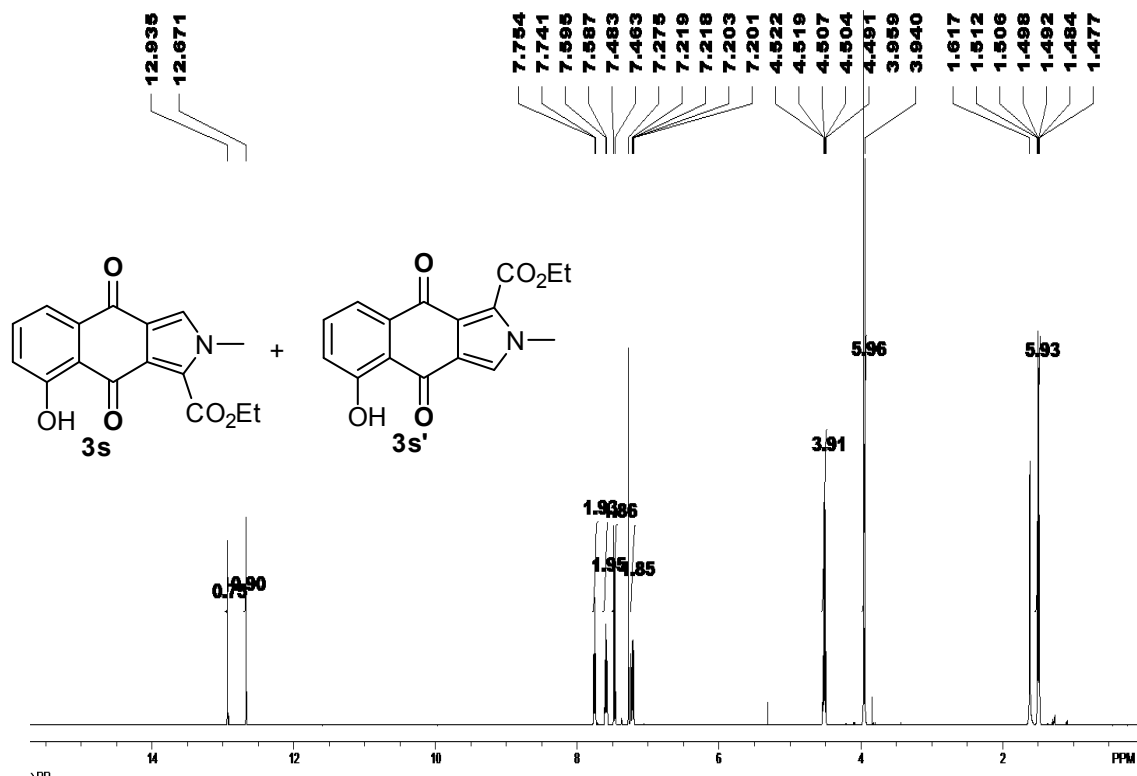

$^{13}\text{C}$  NMR ( $\text{CDCl}_3$ , 125 MHz)

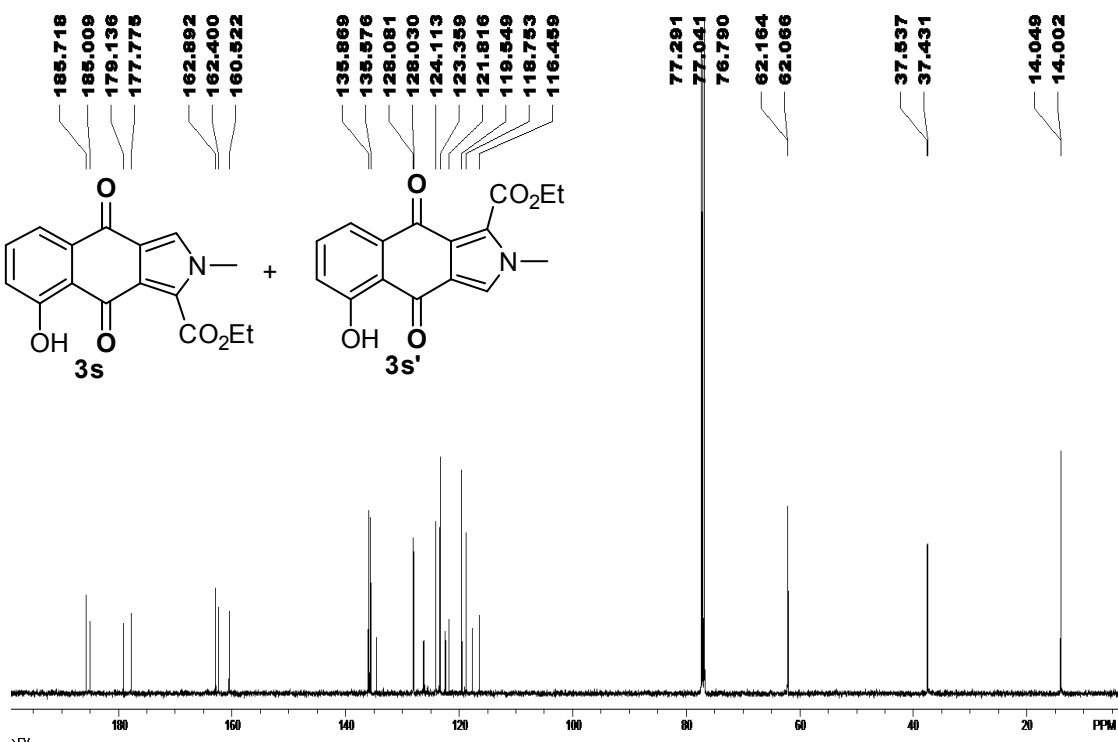

$^1\text{H}$  NMR ( $\text{CDCl}_3$ , 500 MHz)

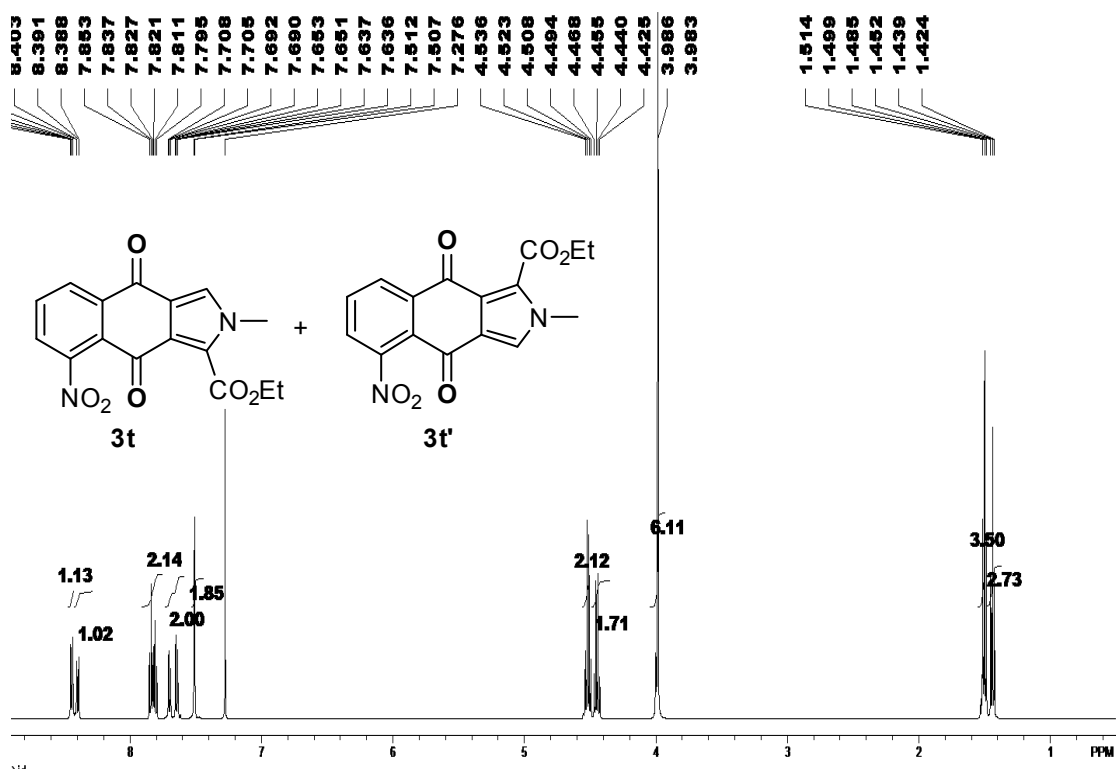

$^{13}\text{C}$  NMR ( $\text{CDCl}_3$ , 125 MHz)

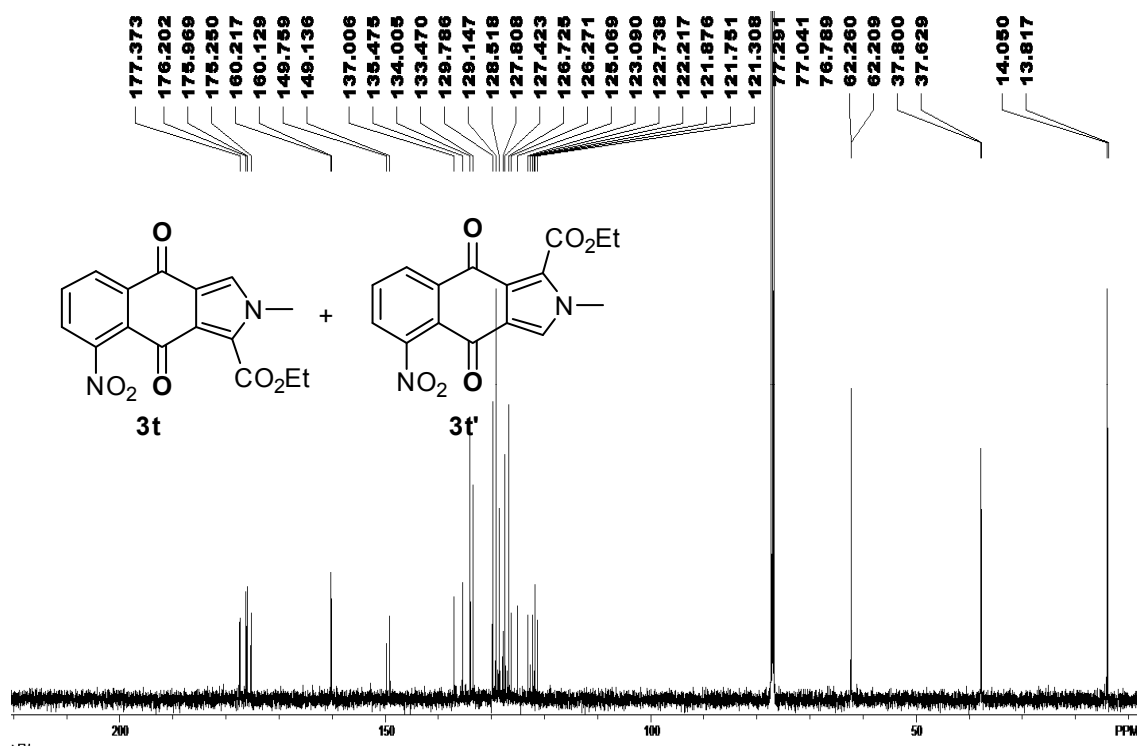

$^1\text{H}$  NMR ( $\text{CDCl}_3$ , 500 MHz)

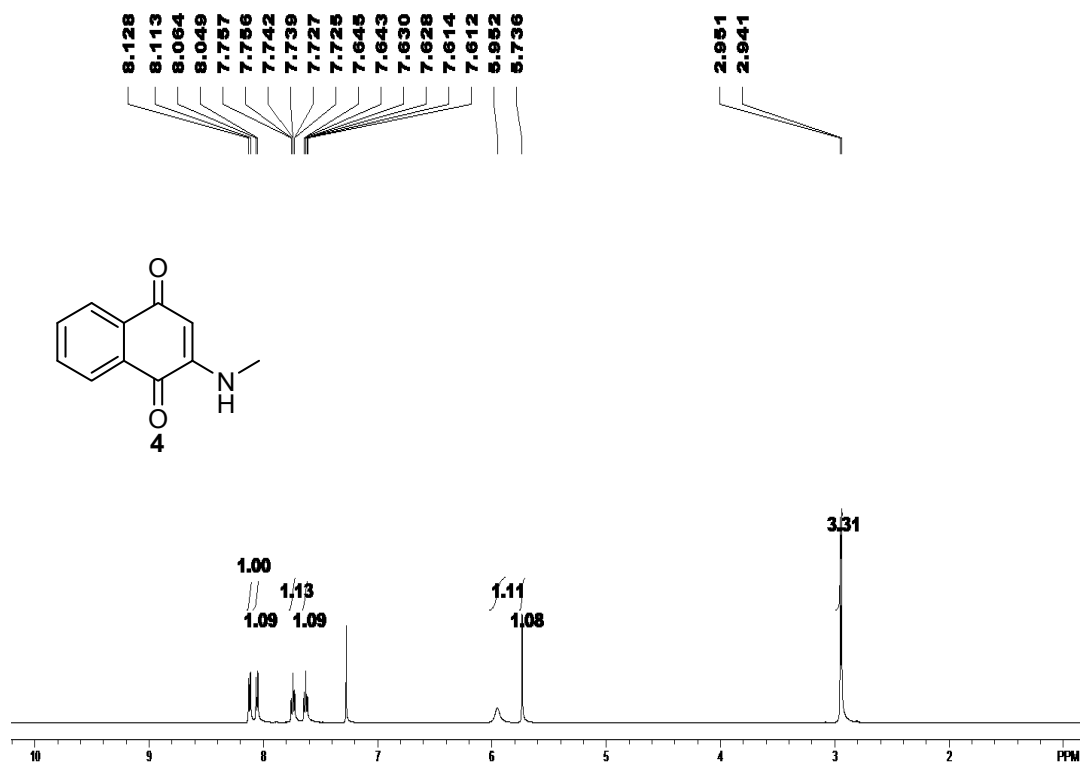

$^1\text{H}$  NMR (500 MHz,  $\text{CDCl}_3$ )

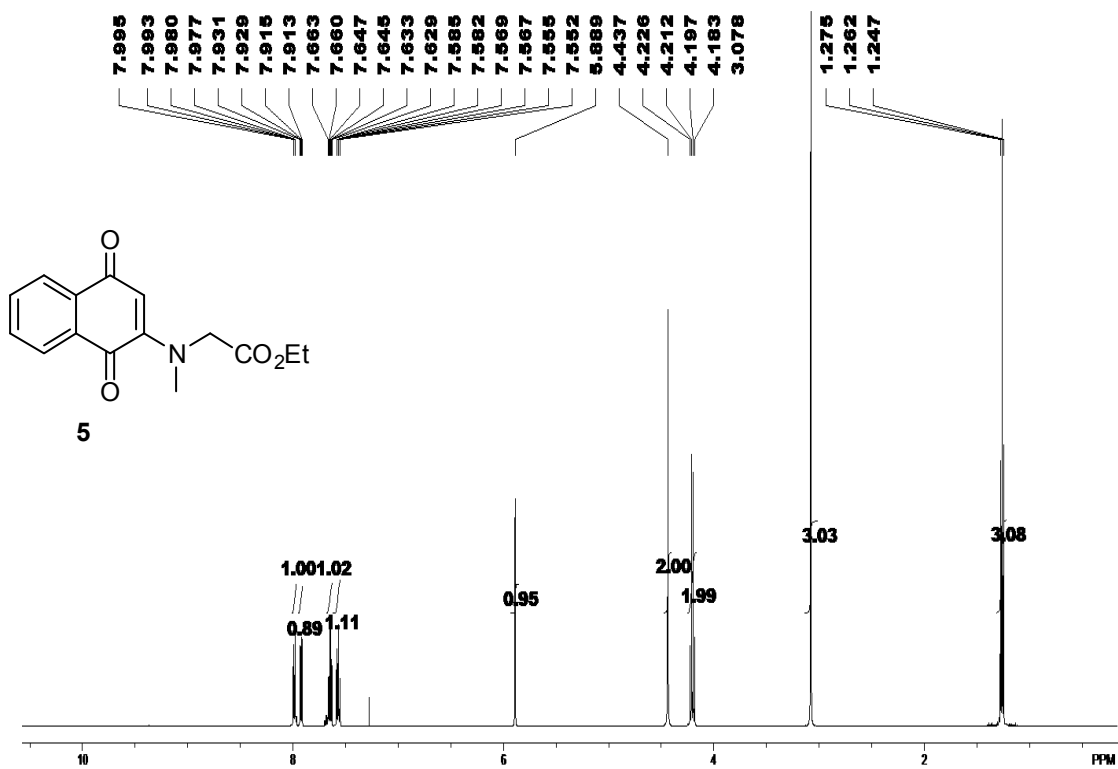

$^{13}\text{C}$  NMR (125MHz,  $\text{CDCl}_3$ )

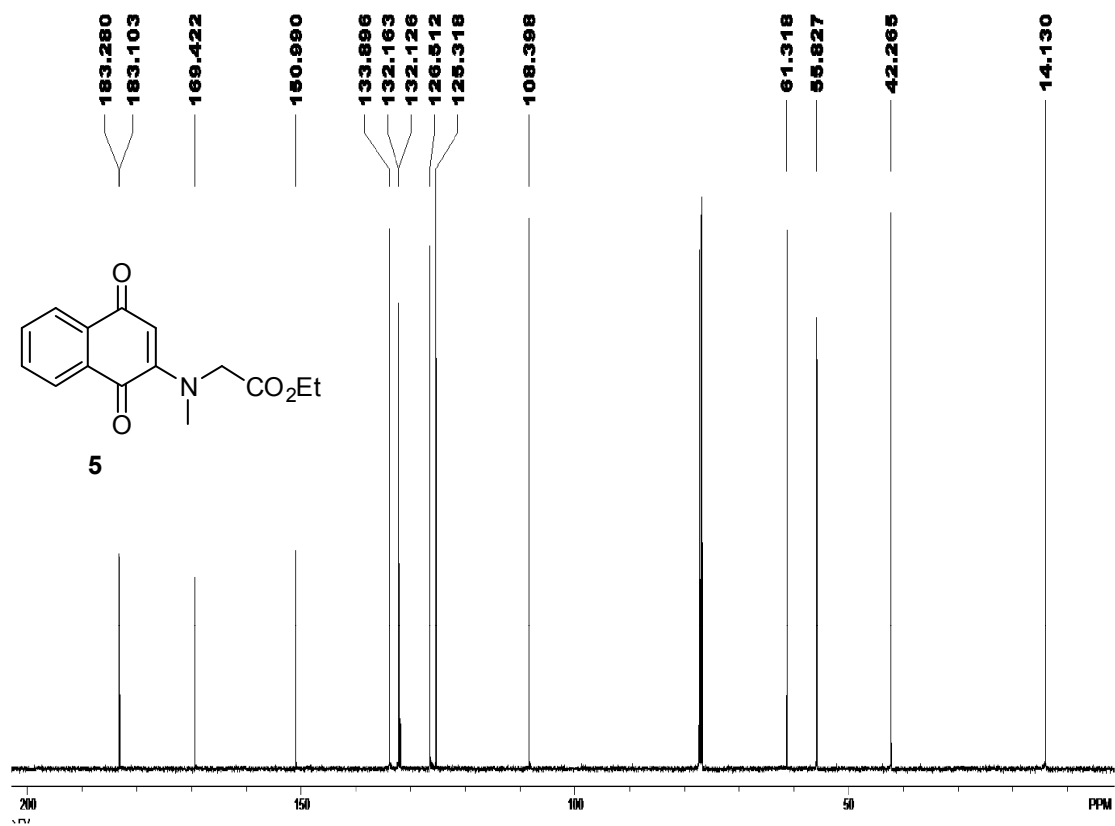



### 3. X ray Crystal Structure of **3d**

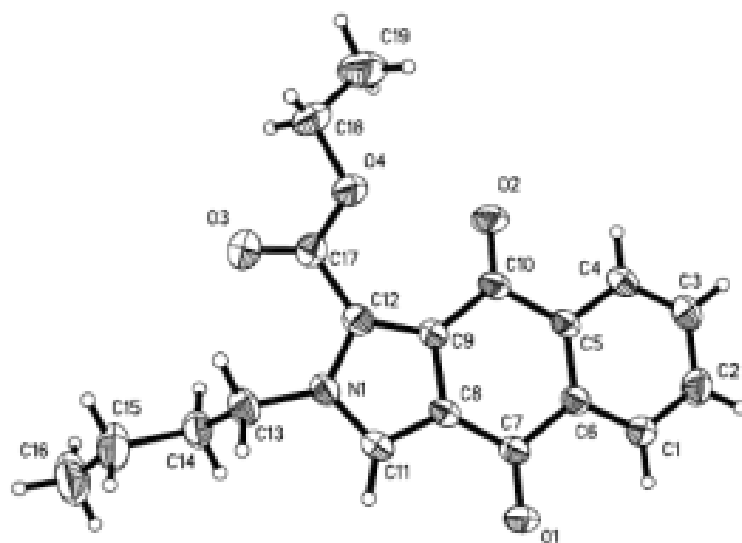

data\_pn

\_audit\_creation\_method SHELXL-97

\_chemical\_name\_systematic

;

?

;

\_chemical\_name\_common ?

\_chemical\_melting\_point ?

\_chemical\_formula\_moiety ?

\_chemical\_formula\_sum

'C19 H19 N O4'

\_chemical\_formula\_weight 325.35

loop\_

\_atom\_type\_symbol

\_atom\_type\_description

\_atom\_type\_scatter\_dispersion\_real

\_atom\_type\_scatter\_dispersion\_imag

\_atom\_type\_scatter\_source

'C' 'C' 0.0033 0.0016

'International Tables Vol C Tables 4.2.6.8 and 6.1.1.4'

'H' 'H' 0.0000 0.0000

'International Tables Vol C Tables 4.2.6.8 and 6.1.1.4'

'N' 'N' 0.0061 0.0033

'International Tables Vol C Tables 4.2.6.8 and 6.1.1.4'

'O' 'O' 0.0106 0.0060

'International Tables Vol C Tables 4.2.6.8 and 6.1.1.4'

\_symmetry\_cell\_setting Monoclinic

\_symmetry\_space\_group\_name\_H-M P21/c

loop\_

\_symmetry\_equiv\_pos\_as\_xyz

'x, y, z'

'-x, y+1/2, -z+1/2'

'-x, -y, -z'

'x, -y-1/2, z-1/2'

\_cell\_length\_a 14.355(3)

|                                 |                |
|---------------------------------|----------------|
| _cell_length_b                  | 4.6193(9)      |
| _cell_length_c                  | 26.723(4)      |
| _cell_angle_alpha               | 90.00          |
| _cell_angle_beta                | 109.262(9)     |
| _cell_angle_gamma               | 90.00          |
| _cell_volume                    | 1672.8(5)      |
| _cell_formula_units_Z           | 4              |
| _cell_measurement_temperature   | 293(2)         |
| _cell_measurement_reflms_used   | ?              |
| _cell_measurement_theta_min     | ?              |
| _cell_measurement_theta_max     | ?              |
| _exptl_crystal_description      | block          |
| _exptl_crystal_colour           | colourless     |
| _exptl_crystal_size_max         | 0.50           |
| _exptl_crystal_size_mid         | 0.20           |
| _exptl_crystal_size_min         | 0.15           |
| _exptl_crystal_density_meas     | ?              |
| _exptl_crystal_density_diffn    | 1.292          |
| _exptl_crystal_density_method   | 'not measured' |
| _exptl_crystal_F_000            | 688            |
| _exptl_absorpt_coefficient_mu   | 0.091          |
| _exptl_absorpt_correction_type  | Multi-scan     |
| _exptl_absorpt_correction_T_min | 0.9560         |
| _exptl_absorpt_correction_T_max | 0.9865         |
| _exptl_absorpt_process_details  | ?              |

\_exptl\_special\_details

;

?

;

|                                 |                          |
|---------------------------------|--------------------------|
| _diffn_ambient_temperature      | 293(2)                   |
| _diffn_radiation_wavelength     | 0.71073                  |
| _diffn_radiation_type           | MoK\alpha                |
| _diffn_radiation_source         | 'fine-focus sealed tube' |
| _diffn_radiation_monochromator  | graphite                 |
| _diffn_measurement_device_type  | ?                        |
| _diffn_measurement_method       | ?                        |
| _diffn_detector_area_resol_mean | ?                        |
| _diffn_standards_number         | ?                        |
| _diffn_standards_interval_count | ?                        |
| _diffn_standards_interval_time  | ?                        |
| _diffn_standards_decay_%        | ?                        |
| _diffn_reflns_number            | 8618                     |
| _diffn_reflns_av_R_equivalents  | 0.0421                   |
| _diffn_reflns_av_sigmal/netI    | 0.0494                   |
| _diffn_reflns_limit_h_min       | -16                      |
| _diffn_reflns_limit_h_max       | 17                       |
| _diffn_reflns_limit_k_min       | -5                       |
| _diffn_reflns_limit_k_max       | 5                        |
| _diffn_reflns_limit_l_min       | -31                      |

\_diffn\_reflms\_limit\_l\_max            31  
\_diffn\_reflms\_theta\_min            2.91  
\_diffn\_reflms\_theta\_max            25.00  
\_reflns\_number\_total            2916  
\_reflns\_number\_gt            1753  
\_reflns\_threshold\_expression       >2sigma(I)  
  
\_computing\_data\_collection       ?  
\_computing\_cell\_refinement       ?  
\_computing\_data\_reduction       ?  
\_computing\_structure\_solution     'SHELXS-97 (Sheldrick, 1990)'  
\_computing\_structure\_refinement   'SHELXL-97 (Sheldrick, 1997)'  
\_computing\_molecular\_graphics    ?  
\_computing\_publication\_material   ?

\_refine\_special\_details

;

Refinement of  $F^2$  against ALL reflections. The weighted R-factor wR and goodness of fit S are based on  $F^2$ , conventional R-factors R are based on F, with F set to zero for negative  $F^2$ . The threshold expression of  $F^2 > 2\text{sigma}(F^2)$  is used only for calculating R-factors(gt) etc. and is not relevant to the choice of reflections for refinement. R-factors based on  $F^2$  are statistically about twice as large as those based on F, and R-factors based on ALL data will be even larger.

;

\_refine\_ls\_structure\_factor\_coef Fsqd

\_refine\_ls\_matrix\_type full

\_refine\_ls\_weighting\_scheme calc

\_refine\_ls\_weighting\_details

'calc w=1/[s^2\*(Fo^2)+(0.0947P)^2+0.1957P] where P=(Fo^2+2Fc^2)/3'

\_atom\_sites\_solution\_primary direct

\_atom\_sites\_solution\_secondary difmap

\_atom\_sites\_solution\_hydrogens geom

\_refine\_ls\_hydrogen\_treatment constr

\_refine\_ls\_extinction\_method none

\_refine\_ls\_extinction\_coef ?

\_refine\_ls\_number\_reflns 2916

\_refine\_ls\_number\_parameters 219

\_refine\_ls\_number\_restraints 0

\_refine\_ls\_R\_factor\_all 0.1024

\_refine\_ls\_R\_factor\_gt 0.0580

\_refine\_ls\_wR\_factor\_ref 0.1851

\_refine\_ls\_wR\_factor\_gt 0.1556

\_refine\_ls\_goodness\_of\_fit\_ref 1.052

\_refine\_ls\_restrained\_S\_all 1.052

\_refine\_ls\_shift/su\_max 0.000

\_refine\_ls\_shift/su\_mean 0.000

loop\_

\_atom\_site\_label

\_atom\_site\_type\_symbol

\_atom\_site\_fract\_x

\_atom\_site\_fract\_y

\_atom\_site\_fract\_z

\_atom\_site\_U\_iso\_or\_equiv

\_atom\_site\_adp\_type

\_atom\_site\_occupancy

\_atom\_site\_symmetry\_multiplicity

\_atom\_site\_calc\_flag

\_atom\_site\_refinement\_flags

\_atom\_site\_disorder\_assembly

\_atom\_site\_disorder\_group

O1 O 0.56301(14) 0.3727(5) 0.08504(8) 0.0747(7) Uani 1 1 d . . .  
O2 O 0.92688(16) 0.8530(6) 0.15289(9) 0.0993(9) Uani 1 1 d . . .  
O3 O 0.8480(3) 1.2726(10) -0.00848(12) 0.1586(17) Uani 1 1 d . . .  
O4 O 0.92435(18) 1.2229(7) 0.07486(10) 0.1093(10) Uani 1 1 d . . .  
N1 N 0.68171(15) 0.9815(5) 0.00345(8) 0.0500(6) Uani 1 1 d . . .  
C1 C 0.6914(2) 0.2291(7) 0.18658(12) 0.0611(8) Uani 1 1 d . . .  
H1 H 0.6297 0.1413 0.1752 0.073 Uiso 1 1 calc R . .  
C2 C 0.7570(2) 0.1672(8) 0.23648(13) 0.0728(9) Uani 1 1 d . . .  
H2 H 0.7392 0.0405 0.2588 0.087 Uiso 1 1 calc R . .  
C3 C 0.8490(2) 0.2948(7) 0.25289(12) 0.0698(9) Uani 1 1 d . . .  
H3 H 0.8934 0.2533 0.2863 0.084 Uiso 1 1 calc R . .  
C4 C 0.8751(2) 0.4822(7) 0.22017(11) 0.0608(8) Uani 1 1 d . . .  
H4 H 0.9375 0.5664 0.2316 0.073 Uiso 1 1 calc R . .  
C5 C 0.81054(18) 0.5490(6) 0.17031(10) 0.0480(7) Uani 1 1 d . . .  
C6 C 0.71703(18) 0.4200(6) 0.15359(10) 0.0483(7) Uani 1 1 d . . .

C7 C 0.64465(18) 0.4856(6) 0.10051(10) 0.0495(7) Uani 1 1 d . . .

C8 C 0.67691(17) 0.6919(6) 0.06862(10) 0.0467(6) Uani 1 1 d . . .

C9 C 0.77142(17) 0.8219(6) 0.08407(10) 0.0458(6) Uani 1 1 d . . .

C10 C 0.84445(19) 0.7534(6) 0.13624(11) 0.0548(7) Uani 1 1 d . . .

C11 C 0.6245(2) 0.7963(6) 0.01907(11) 0.0518(7) Uani 1 1 d . . .

H11 H 0.5600 0.7467 -0.0005 0.062 Uiso 1 1 calc R . .

C12 C 0.77324(18) 1.0011(6) 0.04248(10) 0.0508(7) Uani 1 1 d . . .

C13 C 0.6450(2) 1.1341(7) -0.04772(11) 0.0613(8) Uani 1 1 d . . .

H13A H 0.6821 1.3121 -0.0454 0.074 Uiso 1 1 calc R . .

H13B H 0.5764 1.1858 -0.0546 0.074 Uiso 1 1 calc R . .

C14 C 0.6531(2) 0.9594(7) -0.09288(11) 0.0680(9) Uani 1 1 d . . .

H14A H 0.6161 0.7811 -0.0954 0.082 Uiso 1 1 calc R . .

H14B H 0.7217 0.9089 -0.0863 0.082 Uiso 1 1 calc R . .

C15 C 0.6141(3) 1.1218(8) -0.14536(13) 0.0964(13) Uani 1 1 d . . .

H15A H 0.5495 1.1990 -0.1487 0.116 Uiso 1 1 calc R . .

H15B H 0.6574 1.2848 -0.1442 0.116 Uiso 1 1 calc R . .

C16 C 0.6059(4) 0.9524(11) -0.19215(15) 0.1326(18) Uani 1 1 d . . .

H16A H 0.6697 0.8786 -0.1899 0.199 Uiso 1 1 calc R . .

H16B H 0.5812 1.0723 -0.2231 0.199 Uiso 1 1 calc R . .

H16C H 0.5614 0.7938 -0.1946 0.199 Uiso 1 1 calc R . .

C17 C 0.8513(2) 1.1778(7) 0.03321(13) 0.0635(8) Uani 1 1 d . . .

C18 C 1.0106(3) 1.3772(11) 0.07086(17) 0.1206(17) Uani 1 1 d . . .

H18A H 1.0242 1.3165 0.0392 0.145 Uiso 1 1 calc R . .

H18B H 0.9981 1.5840 0.0685 0.145 Uiso 1 1 calc R . .

C19 C 1.0927(3) 1.3142(11) 0.11652(19) 0.1202(16) Uani 1 1 d . . .

H19A H 1.0747 1.3436 0.1477 0.180 Uiso 1 1 calc R . .



H19B H 1.1465 1.4399 0.1176 0.180 Uiso 1 1 calc R . .

H19C H 1.1123 1.1164 0.1152 0.180 Uiso 1 1 calc R . .

loop\_

\_atom\_site\_aniso\_label

\_atom\_site\_aniso\_U\_11

\_atom\_site\_aniso\_U\_22

\_atom\_site\_aniso\_U\_33

\_atom\_site\_aniso\_U\_23

\_atom\_site\_aniso\_U\_13

\_atom\_site\_aniso\_U\_12

O1 0.0466(11) 0.0990(17) 0.0659(13) 0.0138(12) 0.0016(10) -0.0224(11)

O2 0.0570(13) 0.137(2) 0.0770(16) 0.0399(15) -0.0136(11) -0.0394(14)

O3 0.139(3) 0.244(4) 0.075(2) 0.045(2) 0.0114(17) -0.100(3)

O4 0.0731(15) 0.156(3) 0.0783(17) 0.0388(16) -0.0021(13) -0.0543(16)

N1 0.0521(13) 0.0510(13) 0.0416(12) 0.0026(11) 0.0082(10) 0.0020(11)

C1 0.0520(16) 0.075(2) 0.0540(17) 0.0065(15) 0.0140(14) -0.0060(15)

C2 0.075(2) 0.085(2) 0.060(2) 0.0194(17) 0.0241(17) 0.0028(18)

C3 0.066(2) 0.085(2) 0.0479(17) 0.0137(16) 0.0056(15) 0.0036(17)

C4 0.0500(16) 0.075(2) 0.0465(16) 0.0032(16) 0.0017(13) -0.0006(15)

C5 0.0435(14) 0.0539(16) 0.0414(14) -0.0015(13) 0.0070(11) 0.0016(12)

C6 0.0442(14) 0.0529(16) 0.0454(15) -0.0014(13) 0.0115(11) 0.0006(12)

C7 0.0411(14) 0.0567(16) 0.0451(15) -0.0020(13) 0.0065(12) -0.0021(13)

C8 0.0404(14) 0.0510(15) 0.0434(15) -0.0029(12) 0.0064(11) 0.0032(12)

C9 0.0430(14) 0.0483(15) 0.0416(15) -0.0015(12) 0.0082(11) -0.0008(12)

C10 0.0417(15) 0.0625(18) 0.0513(16) 0.0022(14) 0.0035(13) -0.0051(13)

C11 0.0470(15) 0.0556(16) 0.0450(15) -0.0036(13) 0.0047(12) 0.0010(13)

C12 0.0522(15) 0.0491(15) 0.0480(16) -0.0044(13) 0.0121(12) 0.0002(13)

C13 0.0704(19) 0.0558(18) 0.0502(17) 0.0089(14) 0.0095(14) 0.0086(14)

C14 0.088(2) 0.065(2) 0.0479(18) 0.0061(15) 0.0176(15) -0.0056(17)

C15 0.153(4) 0.075(2) 0.061(2) 0.0076(19) 0.034(2) -0.016(2)

C16 0.184(5) 0.137(4) 0.062(3) 0.017(3) 0.021(3) -0.015(4)

C17 0.070(2) 0.0615(19) 0.0561(19) 0.0053(16) 0.0173(16) -0.0101(16)

C18 0.085(3) 0.158(4) 0.106(3) 0.032(3) 0.014(2) -0.062(3)

C19 0.070(3) 0.143(4) 0.137(4) 0.000(3) 0.019(3) -0.030(3)

\_geom\_special\_details

;

All esds (except the esd in the dihedral angle between two l.s. planes) are estimated using the full covariance matrix. The cell esds are taken into account individually in the estimation of esds in distances, angles and torsion angles; correlations between esds in cell parameters are only used when they are defined by crystal symmetry. An approximate (isotropic) treatment of cell esds is used for estimating esds involving l.s. planes.

;

loop\_

\_geom\_bond\_atom\_site\_label\_1

\_geom\_bond\_atom\_site\_label\_2

\_geom\_bond\_distance

\_geom\_bond\_site\_symmetry\_2

\_geom\_bond\_publ\_flag

O1 C7 1.223(3) . ?

O2 C10 1.209(3) . ?

O3 C17 1.183(4) . ?

O4 C17 1.269(4) . ?

O4 C18 1.463(4) . ?

N1 C11 1.344(3) . ?

N1 C12 1.385(3) . ?

N1 C13 1.473(3) . ?

C1 C6 1.380(4) . ?

C1 C2 1.385(4) . ?

C1 H1 0.9300 . ?

C2 C3 1.379(4) . ?

C2 H2 0.9300 . ?

C3 C4 1.368(4) . ?

C3 H3 0.9300 . ?

C4 C5 1.384(3) . ?

C4 H4 0.9300 . ?

C5 C6 1.400(4) . ?

C5 C10 1.500(4) . ?

C6 C7 1.487(3) . ?

C7 C8 1.452(4) . ?

C8 C11 1.376(3) . ?

C8 C9 1.415(3) . ?

C9 C12 1.393(4) . ?

C9 C10 1.476(3) . ?

C11 H11 0.9300 . ?

C12 C17 1.472(4) . ?

C13 C14 1.488(4) . ?

C13 H13A 0.9700 . ?

C13 H13B 0.9700 . ?

C14 C15 1.524(4) . ?

C14 H14A 0.9700 . ?

C14 H14B 0.9700 . ?

C15 C16 1.447(6) . ?

C15 H15A 0.9700 . ?

C15 H15B 0.9700 . ?

C16 H16A 0.9600 . ?

C16 H16B 0.9600 . ?

C16 H16C 0.9600 . ?

C18 C19 1.419(5) . ?

C18 H18A 0.9700 . ?

C18 H18B 0.9700 . ?

C19 H19A 0.9600 . ?

C19 H19B 0.9600 . ?

C19 H19C 0.9600 . ?

loop\_

\_geom\_angle\_atom\_site\_label\_1

\_geom\_angle\_atom\_site\_label\_2

\_geom\_angle\_atom\_site\_label\_3

\_geom\_angle

\_geom\_angle\_site\_symmetry\_1

\_geom\_angle\_site\_symmetry\_3

\_geom\_angle\_publ\_flag

C17 O4 C18 119.3(3) . . ?

C11 N1 C12 109.4(2) . . ?

C11 N1 C13 121.7(2) . . ?

C12 N1 C13 128.9(2) . . ?

C6 C1 C2 120.5(3) . . ?

C6 C1 H1 119.8 . . ?

C2 C1 H1 119.8 . . ?

C3 C2 C1 119.6(3) . . ?

C3 C2 H2 120.2 . . ?

C1 C2 H2 120.2 . . ?

C4 C3 C2 120.2(3) . . ?

C4 C3 H3 119.9 . . ?

C2 C3 H3 119.9 . . ?

C3 C4 C5 121.3(3) . . ?

C3 C4 H4 119.4 . . ?

C5 C4 H4 119.4 . . ?

C4 C5 C6 118.6(3) . . ?

C4 C5 C10 118.5(2) . . ?

C6 C5 C10 122.9(2) . . ?

C1 C6 C5 119.8(2) . . ?

C1 C6 C7 119.4(2) . . ?

C5 C6 C7 120.8(2) . . ?

O1 C7 C8 122.5(2) . . ?

O1 C7 C6 121.7(2) . . ?

C8 C7 C6 115.8(2) . . ?  
C11 C8 C9 107.4(2) . . ?  
C11 C8 C7 128.0(2) . . ?  
C9 C8 C7 124.6(2) . . ?  
C12 C9 C8 106.7(2) . . ?  
C12 C9 C10 133.4(2) . . ?  
C8 C9 C10 119.9(2) . . ?  
O2 C10 C9 124.7(3) . . ?  
O2 C10 C5 119.4(2) . . ?  
C9 C10 C5 115.9(2) . . ?  
N1 C11 C8 109.0(2) . . ?  
N1 C11 H11 125.5 . . ?  
C8 C11 H11 125.5 . . ?  
N1 C12 C9 107.4(2) . . ?  
N1 C12 C17 119.7(2) . . ?  
C9 C12 C17 132.8(2) . . ?  
N1 C13 C14 113.2(2) . . ?  
N1 C13 H13A 108.9 . . ?  
C14 C13 H13A 108.9 . . ?  
N1 C13 H13B 108.9 . . ?  
C14 C13 H13B 108.9 . . ?  
H13A C13 H13B 107.8 . . ?  
C13 C14 C15 112.1(3) . . ?  
C13 C14 H14A 109.2 . . ?  
C15 C14 H14A 109.2 . . ?  
C13 C14 H14B 109.2 . . ?

C15 C14 H14B 109.2 . . ?

H14A C14 H14B 107.9 . . ?

C16 C15 C14 115.4(3) . . ?

C16 C15 H15A 108.4 . . ?

C14 C15 H15A 108.4 . . ?

C16 C15 H15B 108.4 . . ?

C14 C15 H15B 108.4 . . ?

H15A C15 H15B 107.5 . . ?

C15 C16 H16A 109.5 . . ?

C15 C16 H16B 109.5 . . ?

H16A C16 H16B 109.5 . . ?

C15 C16 H16C 109.5 . . ?

H16A C16 H16C 109.5 . . ?

H16B C16 H16C 109.5 . . ?

O3 C17 O4 122.0(3) . . ?

O3 C17 C12 124.5(3) . . ?

O4 C17 C12 113.4(3) . . ?

C19 C18 O4 108.7(3) . . ?

C19 C18 H18A 110.0 . . ?

O4 C18 H18A 110.0 . . ?

C19 C18 H18B 110.0 . . ?

O4 C18 H18B 110.0 . . ?

H18A C18 H18B 108.3 . . ?

C18 C19 H19A 109.5 . . ?

C18 C19 H19B 109.5 . . ?

H19A C19 H19B 109.5 . . ?

C18 C19 H19C 109.5 . . ?

H19A C19 H19C 109.5 . . ?

H19B C19 H19C 109.5 . . ?

loop\_

\_geom\_torsion\_atom\_site\_label\_1

\_geom\_torsion\_atom\_site\_label\_2

\_geom\_torsion\_atom\_site\_label\_3

\_geom\_torsion\_atom\_site\_label\_4

\_geom\_torsion

\_geom\_torsion\_site\_symmetry\_1

\_geom\_torsion\_site\_symmetry\_2

\_geom\_torsion\_site\_symmetry\_3

\_geom\_torsion\_site\_symmetry\_4

\_geom\_torsion\_publ\_flag

C6 C1 C2 C3 -0.9(5) . . . . ?

C1 C2 C3 C4 0.3(5) . . . . ?

C2 C3 C4 C5 0.2(5) . . . . ?

C3 C4 C5 C6 -0.1(4) . . . . ?

C3 C4 C5 C10 -179.2(3) . . . . ?

C2 C1 C6 C5 1.0(4) . . . . ?

C2 C1 C6 C7 -179.2(3) . . . . ?

C4 C5 C6 C1 -0.5(4) . . . . ?

C10 C5 C6 C1 178.6(3) . . . . ?

C4 C5 C6 C7 179.7(2) . . . . ?

C10 C5 C6 C7 -1.3(4) . . . . ?



C1 C6 C7 O1 -0.6(4) . . . . ?

C5 C6 C7 O1 179.3(3) . . . . ?

C1 C6 C7 C8 179.1(2) . . . . ?

C5 C6 C7 C8 -1.0(4) . . . . ?

O1 C7 C8 C11 1.5(4) . . . . ?

C6 C7 C8 C11 -178.2(3) . . . . ?

O1 C7 C8 C9 -178.1(3) . . . . ?

C6 C7 C8 C9 2.2(4) . . . . ?

C11 C8 C9 C12 -0.6(3) . . . . ?

C7 C8 C9 C12 179.1(2) . . . . ?

C11 C8 C9 C10 179.3(2) . . . . ?

C7 C8 C9 C10 -1.0(4) . . . . ?

C12 C9 C10 O2 -0.2(5) . . . . ?

C8 C9 C10 O2 179.9(3) . . . . ?

C12 C9 C10 C5 178.6(3) . . . . ?

C8 C9 C10 C5 -1.3(4) . . . . ?

C4 C5 C10 O2 0.4(4) . . . . ?

C6 C5 C10 O2 -178.7(3) . . . . ?

C4 C5 C10 C9 -178.5(3) . . . . ?

C6 C5 C10 C9 2.4(4) . . . . ?

C12 N1 C11 C8 0.3(3) . . . . ?

C13 N1 C11 C8 -178.6(2) . . . . ?

C9 C8 C11 N1 0.2(3) . . . . ?

C7 C8 C11 N1 -179.5(2) . . . . ?

C11 N1 C12 C9 -0.7(3) . . . . ?

C13 N1 C12 C9 178.1(2) . . . . ?

C11 N1 C12 C17 176.2(2) . . . . ?

C13 N1 C12 C17 -5.0(4) . . . . ?

C8 C9 C12 N1 0.7(3) . . . . ?

C10 C9 C12 N1 -179.2(3) . . . . ?

C8 C9 C12 C17 -175.6(3) . . . . ?

C10 C9 C12 C17 4.5(5) . . . . ?

C11 N1 C13 C14 -84.1(3) . . . . ?

C12 N1 C13 C14 97.3(3) . . . . ?

N1 C13 C14 C15 179.7(3) . . . . ?

C13 C14 C15 C16 -171.3(4) . . . . ?

C18 O4 C17 O3 -4.9(6) . . . . ?

C18 O4 C17 C12 175.5(4) . . . . ?

N1 C12 C17 O3 -12.2(5) . . . . ?

C9 C12 C17 O3 163.8(4) . . . . ?

N1 C12 C17 O4 167.4(3) . . . . ?

C9 C12 C17 O4 -16.6(5) . . . . ?

C17 O4 C18 C19 -159.8(4) . . . . ?

\_diffn\_measured\_fraction\_theta\_max 0.987

\_diffn\_reflns\_theta\_full 25.00

\_diffn\_measured\_fraction\_theta\_full 0.987

\_refine\_diff\_density\_max 0.225

\_refine\_diff\_density\_min -0.213

\_refine\_diff\_density\_rms 0.038
